# Supplementary material
Source: PubMed Central journal article supplement (PMC8461636)
Supplement: NIHMS1733722-supplement-Methods_S1-S4.pdf [file NIHMS1733722-supplement-Methods_S1-S4.pdf]

**Methods S1. Primers used in this study for cloning and sequencing. Related to STAR Methods.**

| Primer                                                | Sequence                                                      |
|-------------------------------------------------------|---------------------------------------------------------------|
| attB1-SpeI-HindIII-(N-HA)-KRAS <sup>G12D</sup> -fwd   | aaaaagcaggcttcactagtgtctttcataagcttatgtatccatgatgatgtgcccgact |
| attB2-KRAS <sup>G12D</sup> -rev                       | agaaagctgggtgtgacacacattccacagggt                             |
| attB1-SpeI-HindIII-GNAS(EE) <sup>R201H</sup> -fwd_new | aaaaagcaggcttcactagtgtctttcataagcttatgggctgcctcggaac          |
| attB2-GNAS <sup>R201H</sup> -rev_new                  | agaaagctgggtgtagagcagctctgactgacg                             |
| attB1-Luc2-for                                        | aaaaagcaggcttcgccaccatggaagatgcaaaa                           |
| attB2-Luc2-rev                                        | agaaagctgggtgttacacggcgatcttgccgccttc                         |
| attB1-adapter-primer<br>(Gloeckner et al., 2009)      | ggggacaagttgtacaaaaagcaggct                                   |
| attB2-adapter-primer<br>(Gloeckner et al., 2009)      | ggggaccactttgtacaagaaagctgggt                                 |
| PB-seq-fwd                                            | agctcgttagtgaaccgtcagatc                                      |
| PB-seq-rev                                            | gtacaagaaagctgggt                                             |
| GNAS_AS189-fwd                                        | aatatatgccgaccgagcagg                                         |
| Luc2_AS215-fwd                                        | cgcttgtgtccgattcagtc                                          |
| crRNA- <i>CDKN2A</i> exon2                            | GTAGGGGTAATTAGACACCT                                          |
| crRNA- <i>CDKN2A</i> exon3                            | GTCTCGAGTCTATCGATATG                                          |
| <i>CDKN2AKO</i> -external-fwd                         | GCGCTTGGATATACAGCAGTG                                         |
| <i>CDKN2AKO</i> -external-rev                         | ACAGGAGCATCTCCCAACC                                           |
| <i>CDKN2AKO</i> -internal-fwd                         | GGCATTGTGAGCAACCACTG                                          |
| <i>CDKN2AKO</i> -internal-rev                         | CCTGTAGGACCTTCGGTGAC                                          |
| GNAS-exon8-fwd<br>(Salinas-Souza et al., 2015)        | CCAGACCTTTGCTTTAGATTGG                                        |
| GNAS-exon9-rev (Wood et al., 2017)                    | CACAGCATCCTACCGTTGAAG                                         |

**Methods S2. Composition of solutions for ion secretion and uptake experiments. Related to STAR Methods “pH measurements via fluorescence microscopy”.**

|                                            | Standard HEPES | Na-Free HCO <sub>3</sub> <sup>-</sup> | Standard HCO <sub>3</sub> <sup>-</sup> | NH <sub>4</sub> Cl·HCO <sub>3</sub> <sup>-</sup> |
|--------------------------------------------|----------------|---------------------------------------|----------------------------------------|--------------------------------------------------|
| NaCl [mM]                                  | 130            | -                                     | 115                                    | 95                                               |
| KCl [mM]                                   | 5              | 5                                     | 5                                      | 5                                                |
| MgCl <sub>2</sub> [mM]                     | 1              | 1                                     | 1                                      | 1                                                |
| CaCl <sub>2</sub> [mM]                     | 1              | 1                                     | 1                                      | 1                                                |
| Hepes [mM]                                 | 10             | -                                     | -                                      | -                                                |
| Glucose [mM]                               | 10             | 10                                    | 10                                     | 10                                               |
| NaHCO <sub>3</sub> <sup>-</sup> [mM]       | -              | -                                     | 25                                     | 25                                               |
| NH <sub>4</sub> Cl [mM]                    | -              | -                                     | -                                      | 20                                               |
| NMDG [mM]                                  | -              | 115                                   | -                                      | -                                                |
| Choline HCO <sub>3</sub> <sup>-</sup> [mM] | -              | 25                                    | -                                      | -                                                |
| Atropine [mM]                              | -              | 0.01                                  | -                                      | -                                                |

**Methods S3. Self-designed or commercially available qPCR primers used in this study. Related to STAR Methods “RNA isolation, reverse transcription and qPCR”.**

| Gene          | Forward primer sequence (fwd) | Reverse primer sequence (rev) | QuantiTect Cat# |
|---------------|-------------------------------|-------------------------------|-----------------|
| <i>ALB</i>    | -                             | -                             | QT00063693*     |
| <i>AMY2A</i>  | -                             | -                             | QT01680595*     |
| <i>BAX</i>    | tggagctgcagaggatgattg         | gaagttgccgtcagaaaacatg        |                 |
| <i>CFTR</i>   | -                             | -                             | QT00070007*     |
| <i>FN1</i>    | -                             | -                             | QT00038024*     |
| <i>GCG</i>    | -                             | -                             | QT00091756*     |
| <i>HMBS</i>   | -                             | -                             | QT00494130*     |
| <i>INS</i>    | -                             | -                             | QT01531040*     |
| <i>KRAS</i>   | -                             | -                             | QT00083622*     |
| <i>KRT19</i>  | ctacagccactactacacgac         | cagagcctgttccgtctcaaa         |                 |
| <i>KRT7</i>   | ggagccgtgaatatctctgtga        | tgcggtccggatggaataag          |                 |
| <i>N-CAD</i>  | -                             | -                             | QT00063196*     |
| <i>NKX6-1</i> |                               |                               | QT00092379*     |
| <i>P21</i>    | gcgcatgtcagaaccgcct           | gcaggcttctgtggcgga            |                 |
| <i>PDX1</i>   | -                             | -                             | QT00201859*     |
| <i>PTF1A</i>  | -                             | -                             | QT01033396*     |
| <i>RELA</i>   | atagaagagcagcgtgggga          | ttgggggcacgattgtcaaa          |                 |
| <i>SLUG</i>   | cagtgattattccccgtatc          | ccccaaagatgaggagtatc          |                 |
| <i>SNAIL</i>  | gctccttcgtccttctcctc          | tgacatctgagtggtctgg           |                 |
| <i>SOX4</i>   | -                             | -                             | QT00220605*     |
| <i>SOX9</i>   | -                             | -                             | QT00001498*     |
| <i>TWIST1</i> | ctagatgtcattgtttccagag        | ccctgtttcttgaatttgg           |                 |
| <i>VIM</i>    | gacaatgcgtctctggcacgtctt      | tctcgcctcctgcaggttctt         |                 |
| <i>ZEB1</i>   | aaagatgatgaatgcgagtc          | tccatttcatcatgaccac           |                 |

\*Primer sequences for commercial Qiagen primers are not available.

**Methods S4. IHC/IF conditions for antibodies used in this study. Related to STAR Methods “IF and IHC staining on paraffin tissue sections” and “IF staining on cryo sections”.**

| Embedding | Antibody | Species | Company              | Catalogue no. | Condition | Dilution |
|-----------|----------|---------|----------------------|---------------|-----------|----------|
| paraffin  | ActTUB   | rabbit  | Abcam                | ab179484      | MW Citrat | 1000     |
| paraffin  | AMY2A    | rabbit  | Sigma                | A8273-1VL     | MW Citrat | 300      |
| paraffin  | C-pep    | rabbit  | Cell Signaling       | 4593          | MW Citrat | 100      |
| paraffin  | CA19-9   | mouse   | Thermo               | 116-NS-19-9   | MW Citrat | 500      |
| paraffin  | CDX2     | rabbit  | Cell Marque - RabMab | MU392-UC      | MW Citrat | 500      |
| paraffin  | CFTR     | mouse   | R&D                  | MAB1660       | ST Tris   | 200      |
| paraffin  | CLDN1    | rabbit  | Abcam                | ab15098       | ST Tris   | 100      |
| paraffin  | E-CAD    | mouse   | Dako                 | M3612         | PC Citrat | 100      |
| paraffin  | E-CAD    | mouse   | BD Bioscience        | 610182        | MW Citrat | 1000     |

|          |             |        |                                                   |                         |                         |      |
|----------|-------------|--------|---------------------------------------------------|-------------------------|-------------------------|------|
| paraffin | GCG         | mouse  | Sigma                                             | G2654                   | MW Citrat               | 500  |
| paraffin | GFP         | rabbit | Thermo                                            | A6455                   | No AGR                  | 1500 |
| paraffin | H-NUCL      | mouse  | Abcam                                             | ab190710                | MW Citrat               | 200  |
| paraffin | HA-Tag      | rabbit | Cell Signaling                                    | 3724                    | MW Citrat               | 500  |
| paraffin | HNF1B       | mouse  | Abcam                                             | ab236759                | MW Citrat               | 100  |
| paraffin | Ki-67       | rabbit | Thermo                                            | MA5-14520               | MW Citrat               | 100  |
| paraffin | Ki-67       | mouse  | Dako                                              | M7240                   | MW Citrat               | 200  |
| paraffin | KRT19 (IF)  | mouse  | Dako                                              | M0888                   | MW Citrat               | 100  |
| paraffin | KRT19 (IHC) | mouse  | Dako                                              | M0888                   | Pronase                 | 100  |
| paraffin | KRT7 (IF)   | mouse  | Dako                                              | M7018                   | MW Citrat               | 200  |
| paraffin | KRT7 (IHC)  | mouse  | Dako                                              | M7018                   | Pronase                 | 200  |
| paraffin | KRT8        | mouse  | BD Bioscience                                     | 345779                  | ST Tris                 | 100  |
| paraffin | mCherry     | rabbit | Abcam                                             | ab167453                | No AGR                  | 500  |
| paraffin | MUC1        | mouse  | Santa Cruz                                        | sc-7313                 | MW Citrat               | 100  |
| paraffin | MUC5AC      | mouse  | Santa Cruz                                        | sc-33667                | MW Citrat               | 50   |
| paraffin | N-CAD       | rabbit | Cell Signaling                                    | 13116                   | MW Citrat or ST Tris    | 100  |
| paraffin | NKX6-1      | mouse  | Developmental<br>Studies Hybridoma<br>Bank (DSHB) | F55A12<br>(concentrate) | MW Citrat               | 150  |
| paraffin | P21         | rabbit | Abcam                                             | ab109520                | MW Citrat               | 300  |
| paraffin | P53         | mouse  | Santa Cruz                                        | sc-47698                | MW Citrat               | 100  |
| paraffin | PDX1        | goat   | R&D                                               | AF2419                  | MW Citrat               | 500  |
| paraffin | PKC         | rabbit | Abcam                                             | ab59364                 | MW Citrat               | 200  |
| paraffin | pRB         | rabbit | Cell Signaling                                    | 8516                    | ST Citrat               | 200  |
| paraffin | RB          | mouse  | Cell Signaling                                    | 9309                    | ST Citrat               | 400  |
| paraffin | SOX9        | rabbit | Millipore                                         | AB5535                  | MW Citrat               | 500  |
| paraffin | Turbo GFP   | Rabbit | Thermo                                            | PA5-22688               | ST Tris                 | 250  |
| paraffin | VIM         | rabbit | Cell Signaling                                    | 5741S                   | MW Citrat               | 500  |
| paraffin | Zeb1        | rabbit | Santa Cruz                                        | sc-25388                | PC Citrat               | 300  |
| paraffin | ZO1         | mouse  | Thermo                                            | 33-9100                 | MW Citrat               | 500  |
| cryo     | C-pep       | rabbit | Cell Signaling                                    | #4593                   | No AGR                  | 100  |
| cryo     | CD31        | rat    | BD Bioscience                                     | 557355                  | No AGR                  | 100  |
| cryo     | CTRC        | mouse  | Millipore                                         | MAB1476                 | No AGR                  | 1200 |
| cryo     | GCG         | mouse  | Sigma                                             | G2654                   | No AGR                  | 500  |
| cryo     | E-CAD       | rabbit | Cell Signaling                                    | 3195                    | No AGR                  | 200  |
| cryo     | KRT7        | mouse  | Dako                                              | M7018                   | No AGR                  | 200  |
| cryo     | KRT8        | mouse  | BD Bioscience                                     | 345779                  | No AGR                  | 100  |
| cryo     | KRT19       | mouse  | Dako                                              | M0888                   | No AGR                  | 100  |
| cyro     | CFTR        | rabbit | Alomone                                           | ACL-006                 | HB 94°C<br>Citrat/Tween | 200  |
| cyro     | Occludin    | mouse  | Thermo                                            | 33-1500                 | HB 94°C<br>Citrat/Tween | 200  |

\*MW, microwave; No AGR, no antigen retrieval; PC, pressure cooker; ST, steamer; HB, heating block;
