# Supplementary material
Source: PubMed Central journal article supplement (PMC8461636)
Supplement: NIHMS1733722-supplement-suppl_materials.pdf [file NIHMS1733722-supplement-suppl_materials.pdf]

**A**

| Phase I                     |                              |                                 | Phase II                    |                              |                   |
|-----------------------------|------------------------------|---------------------------------|-----------------------------|------------------------------|-------------------|
| <b>7 positive compounds</b> | <b>13 negative compounds</b> |                                 | <b>4 positive compounds</b> | <b>24 negative compounds</b> |                   |
| 50 ng/ml EGF                | Alk5i-II                     | LDN-193189                      | 50 ng/ml EGF                | Activin A                    | CHIR99021         |
| 50 ng/ml FGF10              | Avagacestat                  | Na <sub>2</sub> CO <sub>3</sub> | 50 ng/ml FGF10              | Alk5i-II                     | Dexamethasone     |
| 50 ng/ml KGF                | BMP-4                        | RA                              | 10 mM Nicotinamide          | Avagacestat                  | FGF1              |
| 50 nM MSC2530818            | DAPT                         | R-Spondin                       | 10 μM ZnSO <sub>4</sub>     | Axitinib                     | FGF2              |
| 10 mM Nicotinamide          | FGF1                         | SANT-1                          |                             | BMP-4                        | Follistatin       |
| 10 μM ROCK Inh. Y-27632     | FGF2                         | TGF-β                           |                             | BMP-7                        | ILV               |
| 10 μM ZnSO <sub>4</sub>     | ILV                          |                                 |                             |                              | Neuregulin-4      |
|                             |                              |                                 |                             |                              | RA                |
|                             |                              |                                 |                             |                              | R-Spondin         |
|                             |                              |                                 |                             |                              | ROCK Inh. Y-27632 |
|                             |                              |                                 |                             |                              | Synthaxin         |
|                             |                              |                                 |                             |                              | TGF-β             |
|                             |                              |                                 |                             |                              | VEGF-164          |

**B**
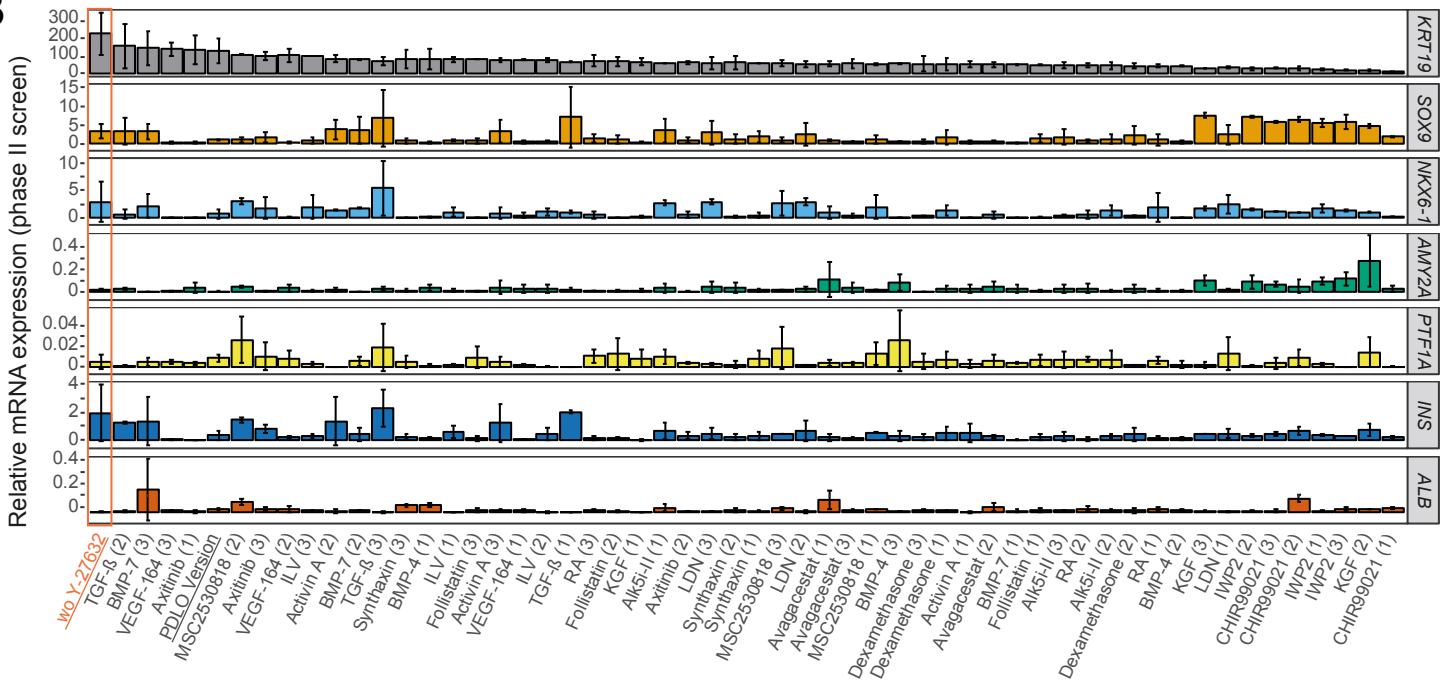
**C**
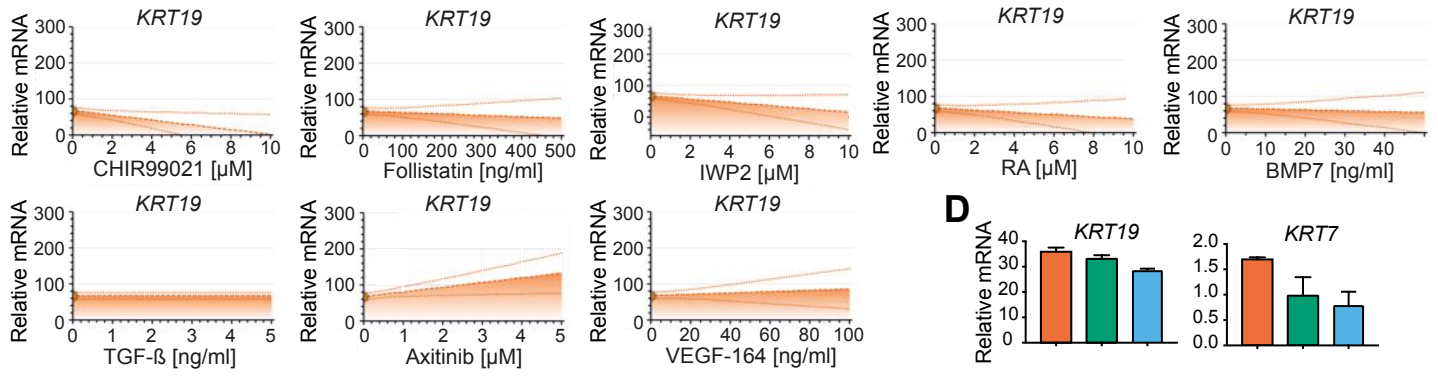
**D**
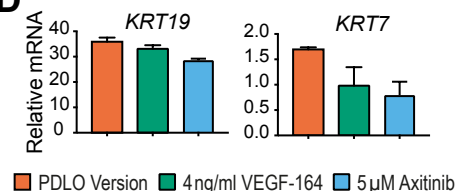
**E**
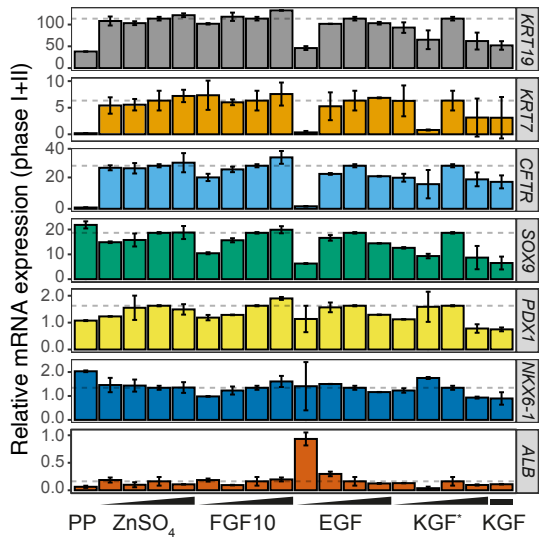
**F**
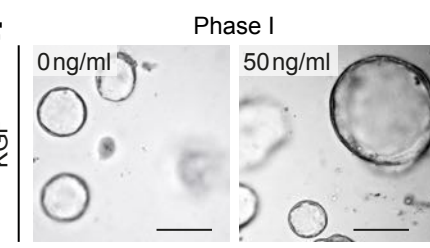
**G**
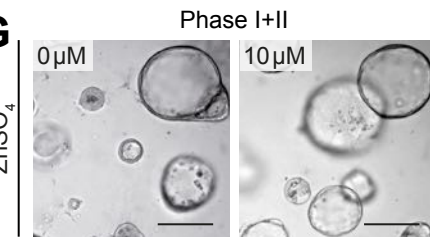
**H**
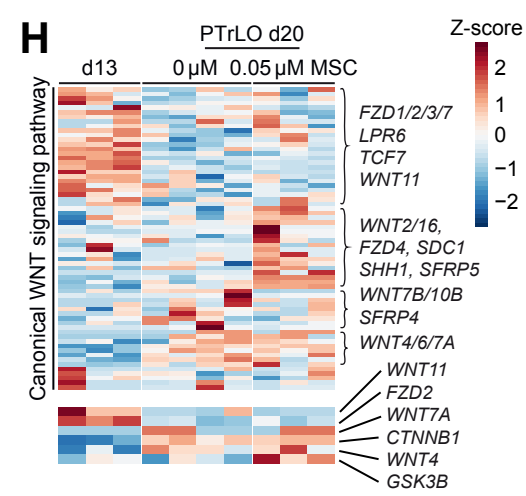

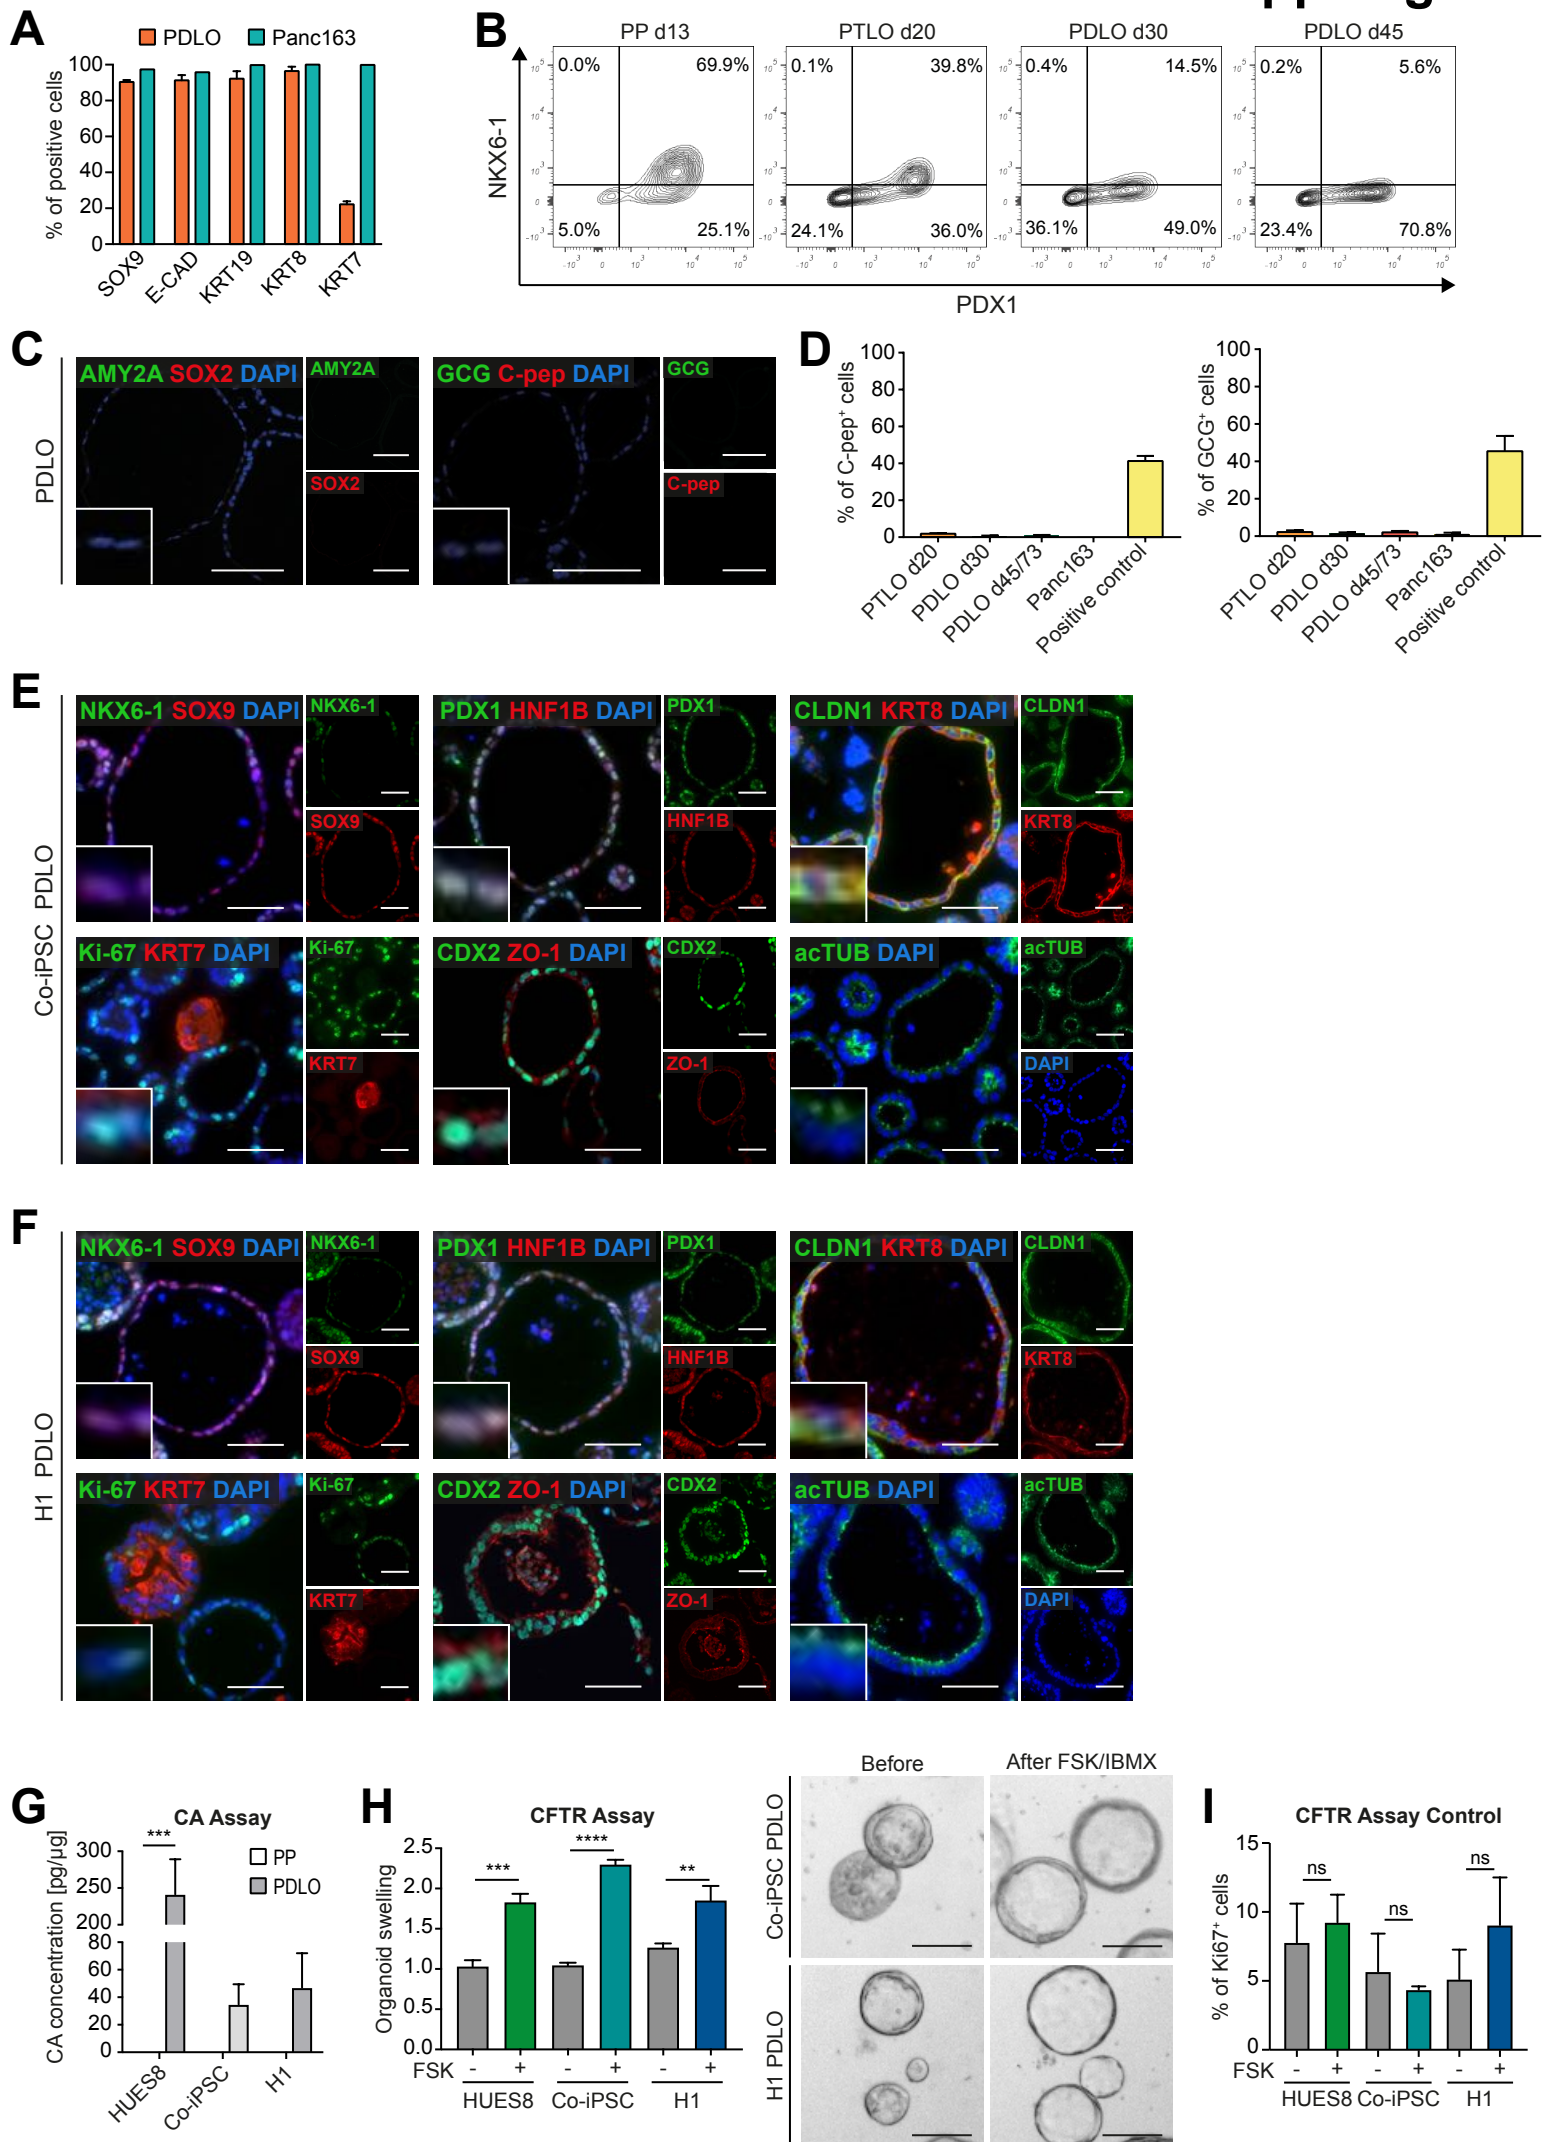

# Suppl Figure 3

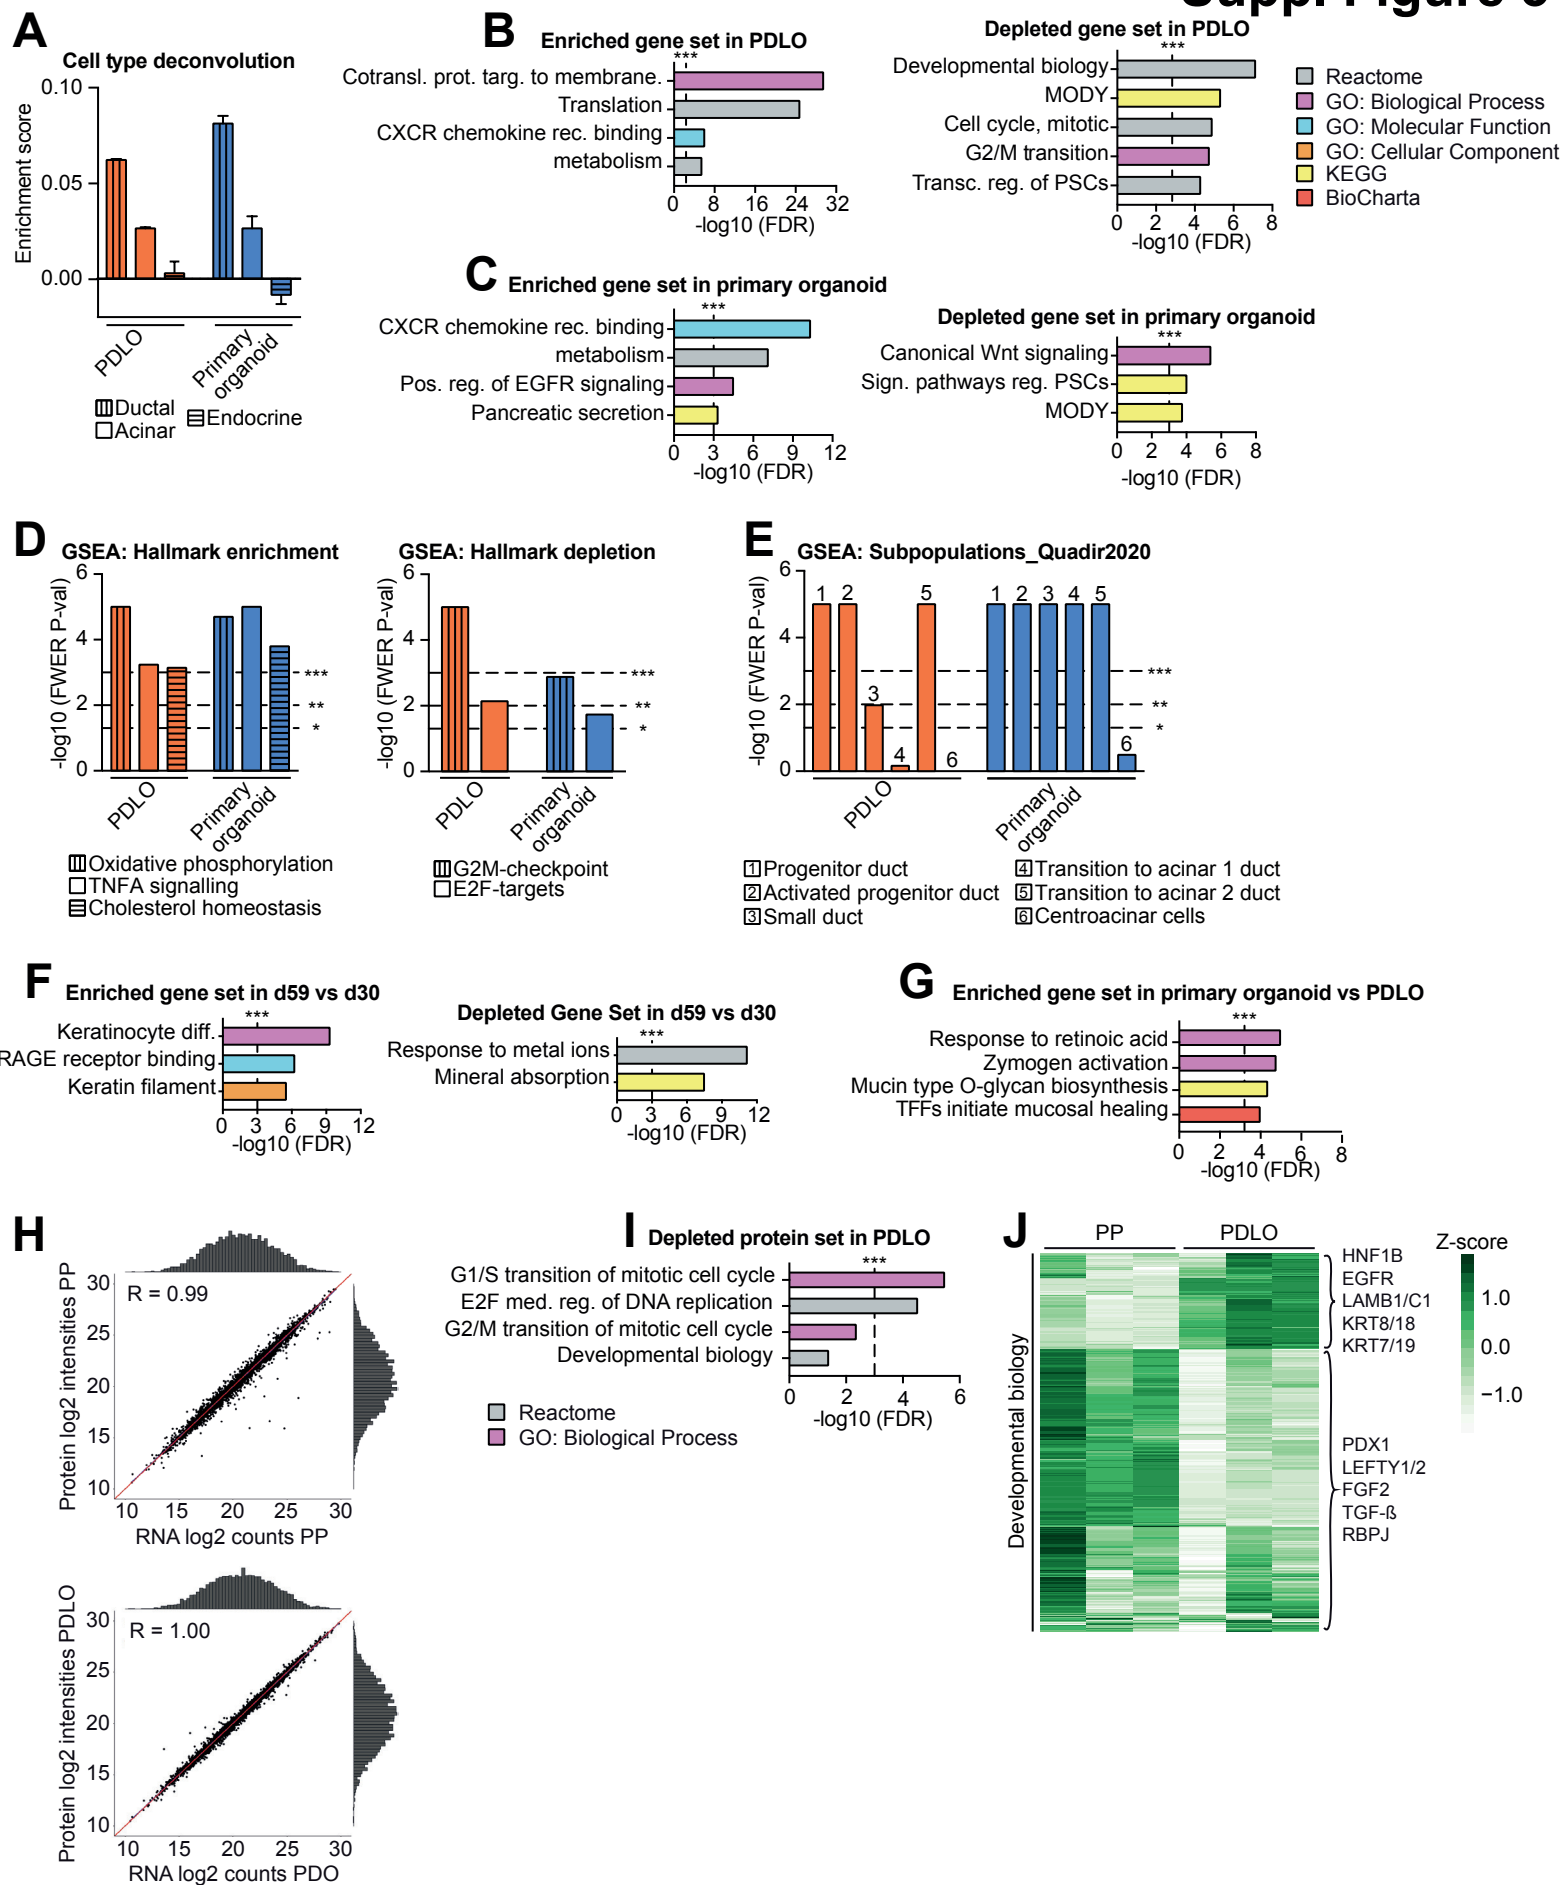



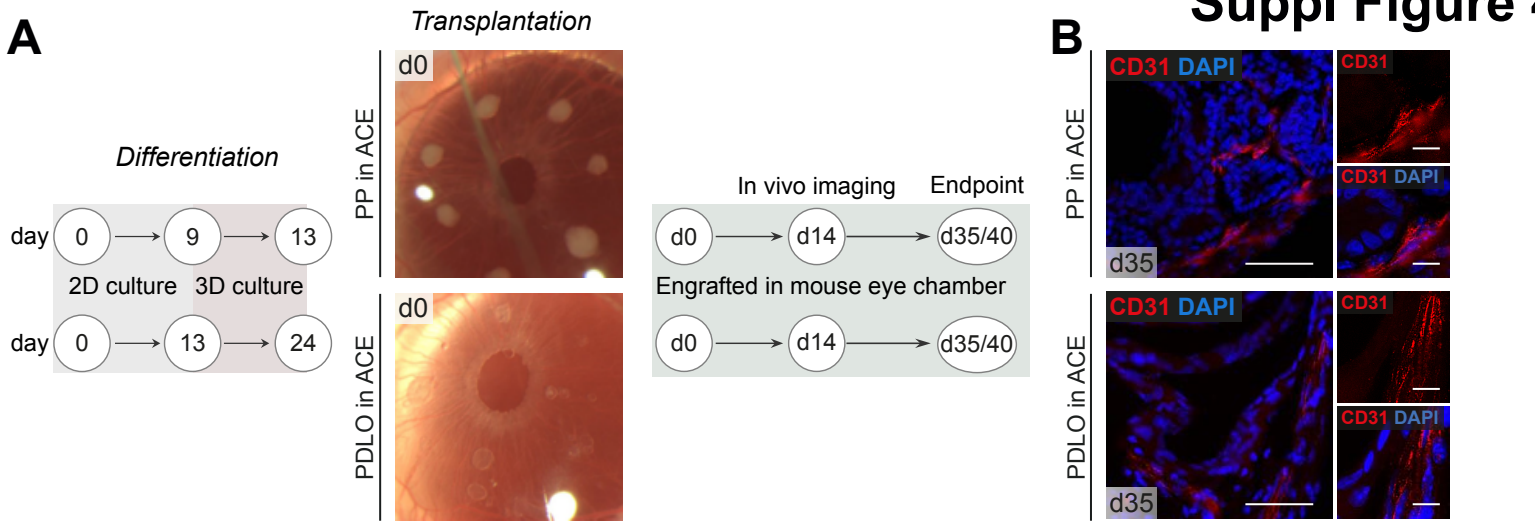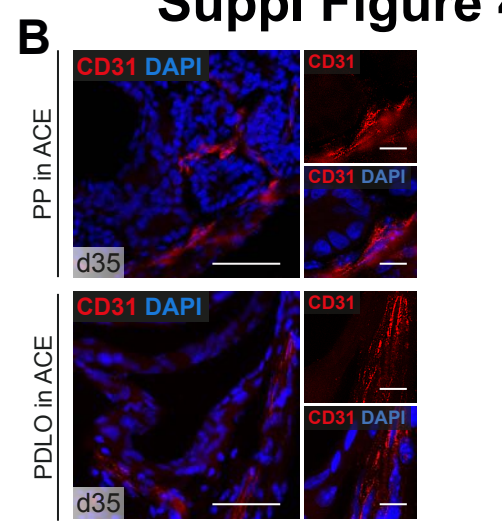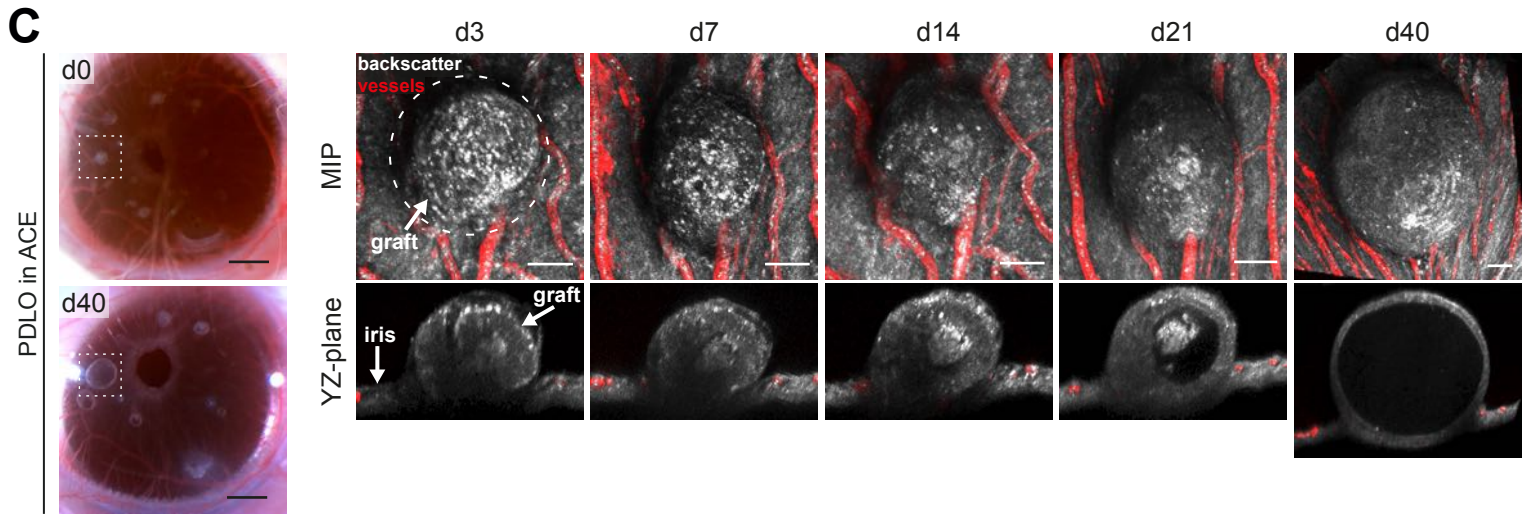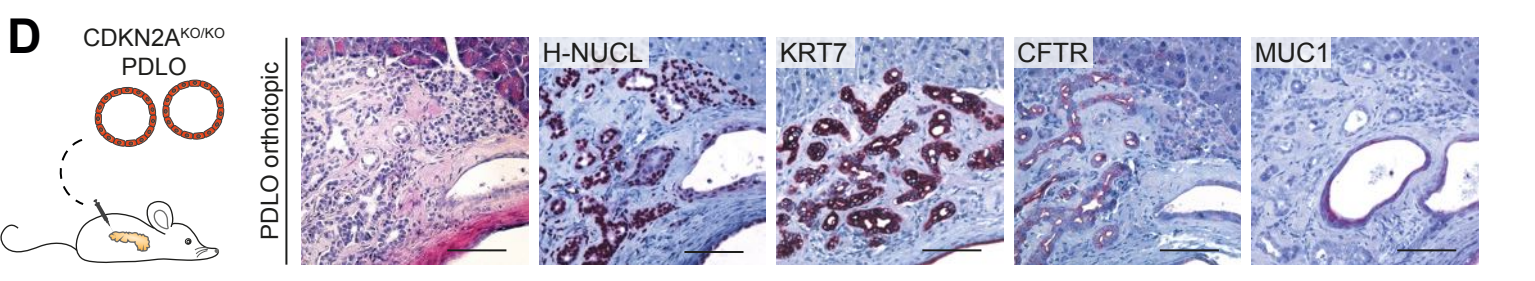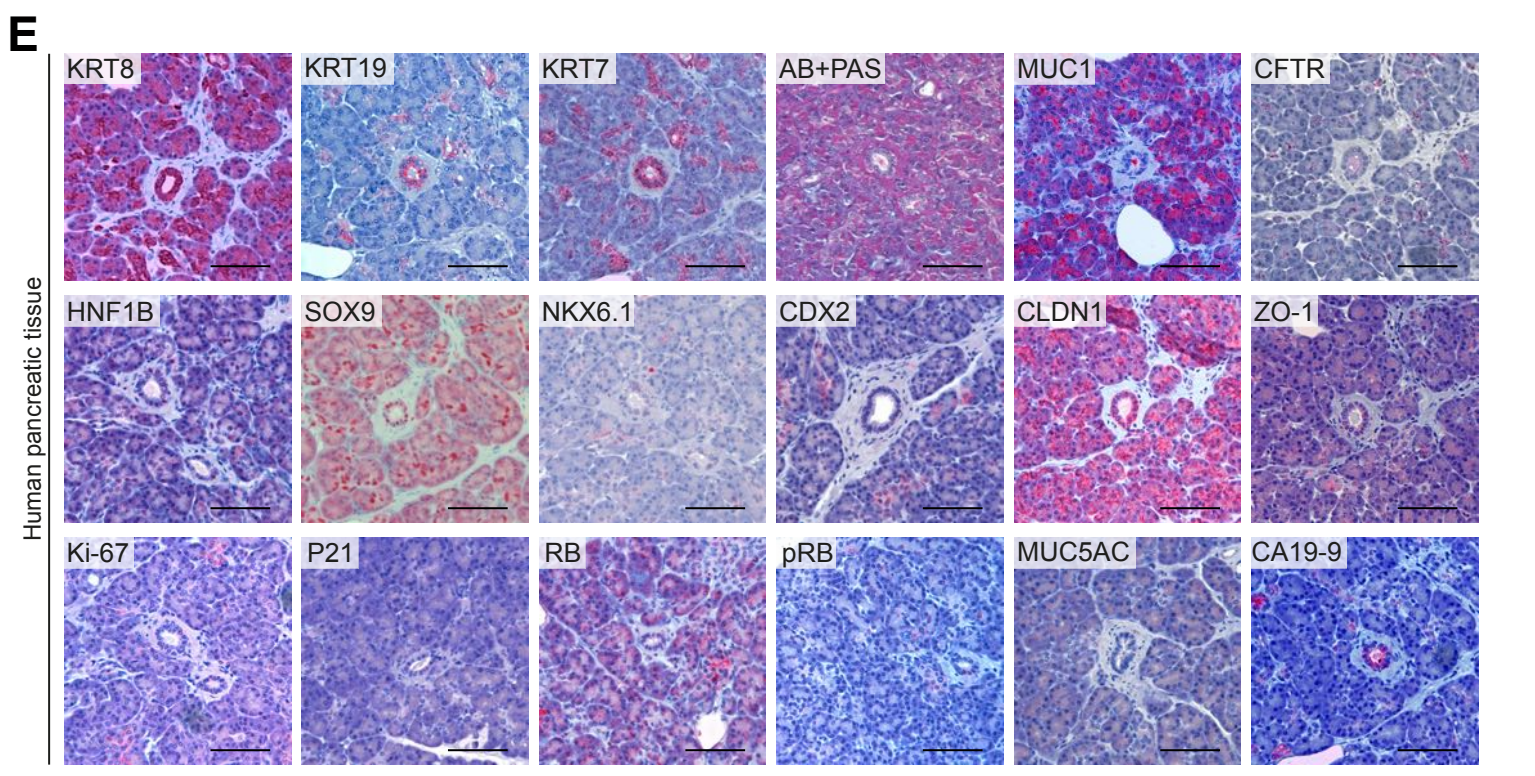



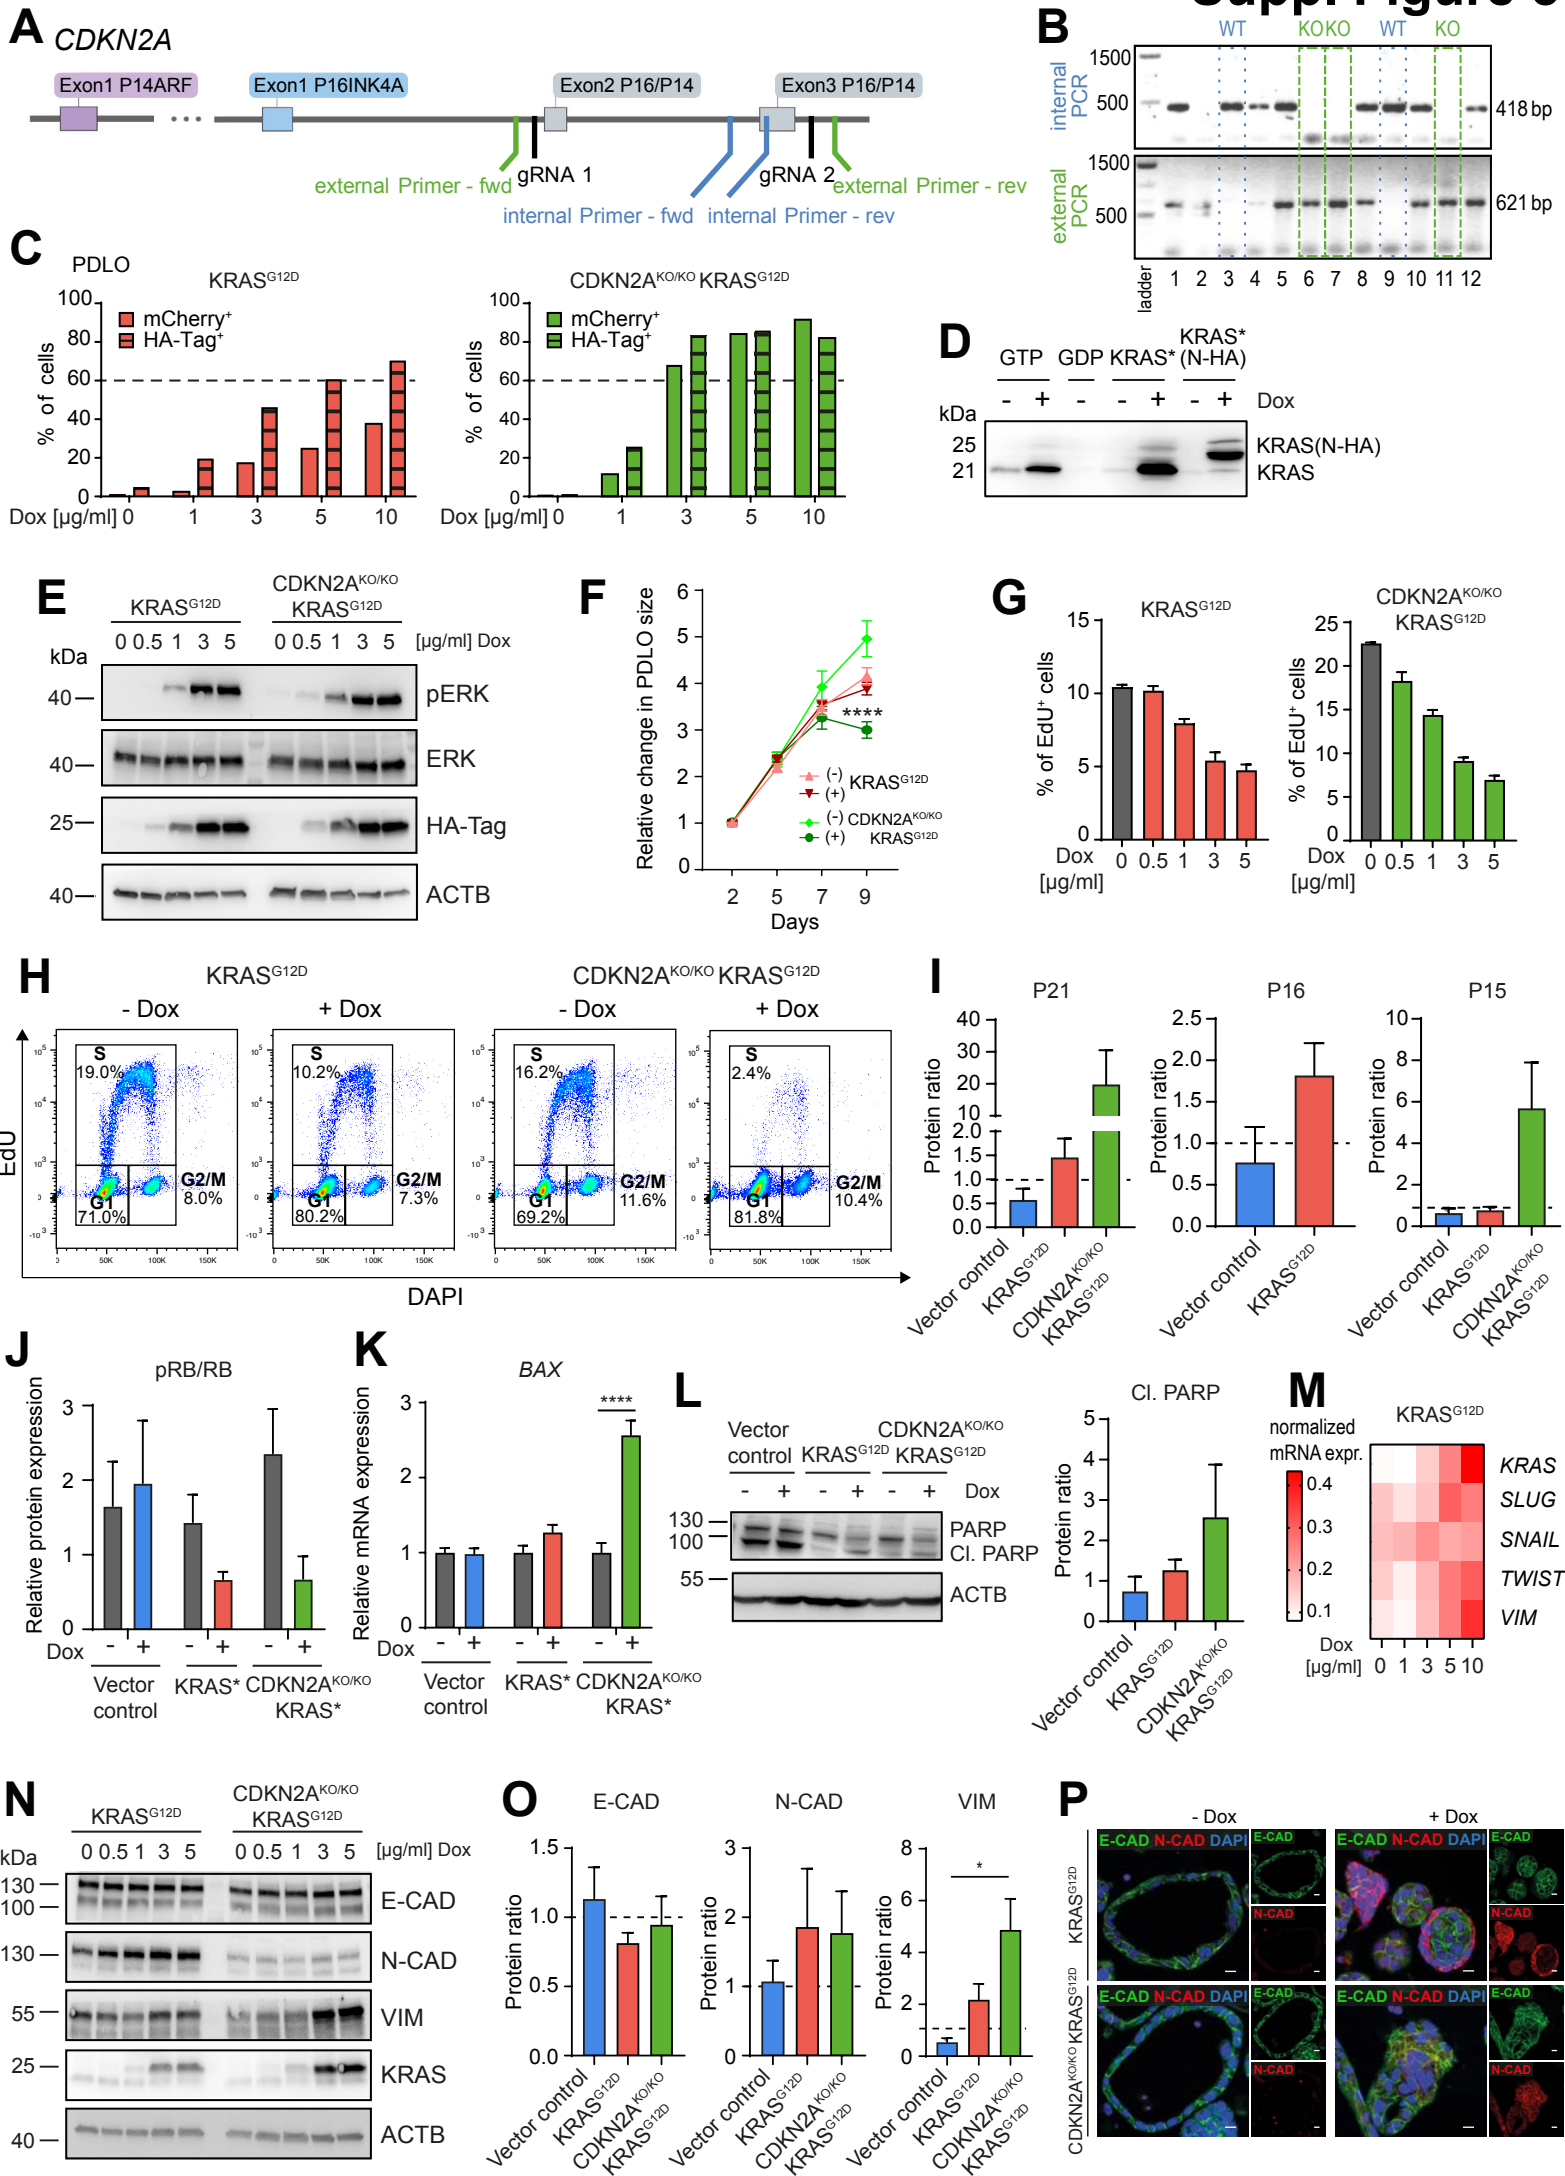

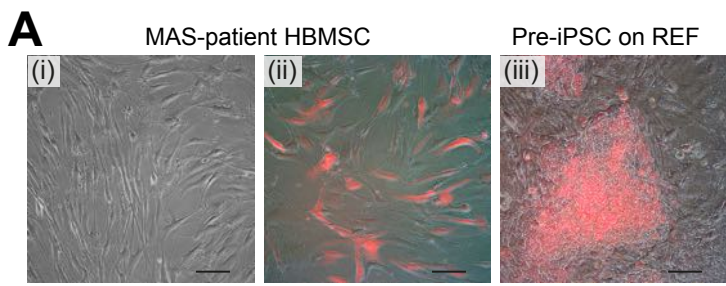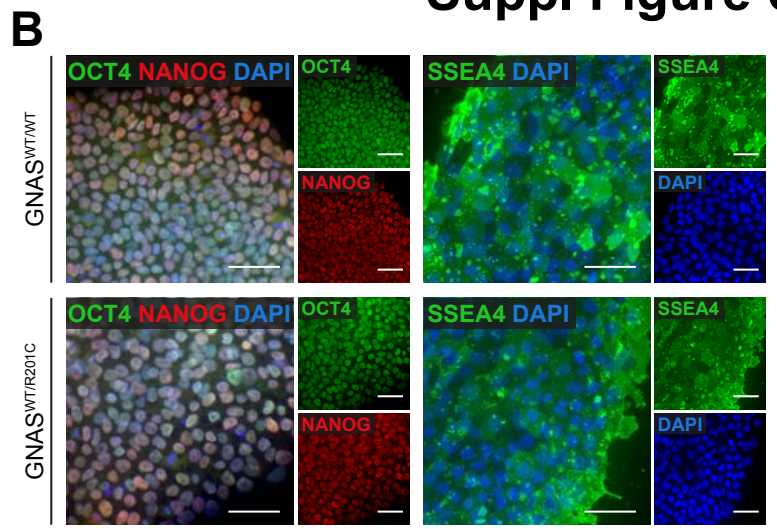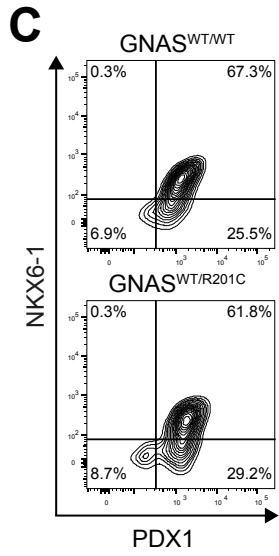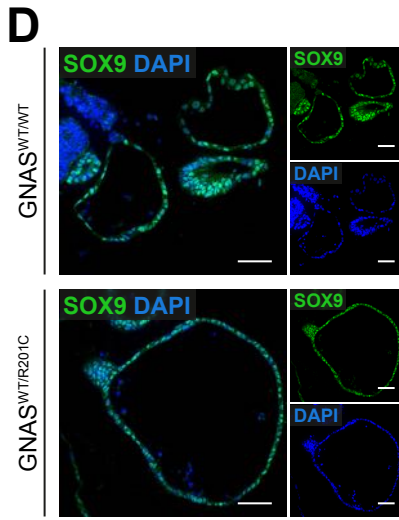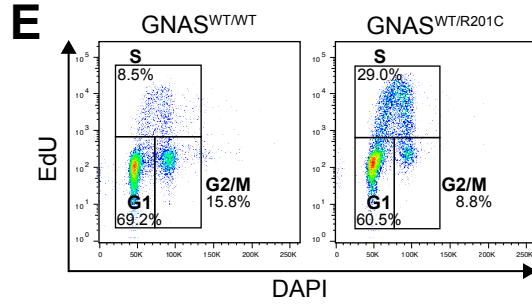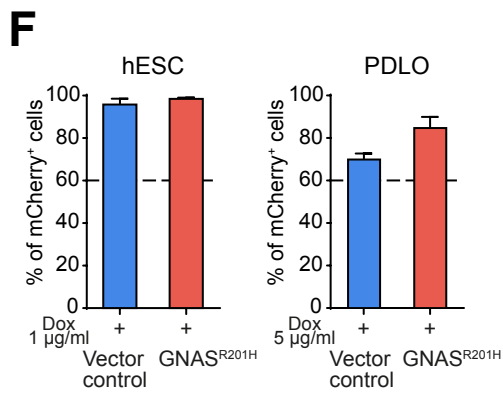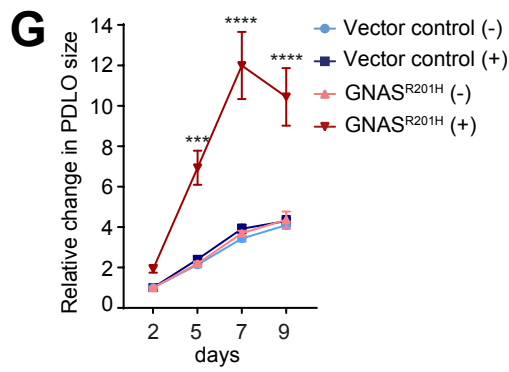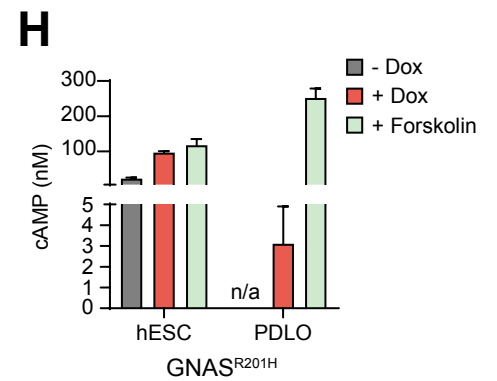



## A

| Genotype                                             | Take rate | Reporter expr. | Normal duct | Papillary cystic | Non-cystic lesion | Diff. PDAC | Dediff. PDAC | Atypia/ Dysplasia |      |          | MUC5AC | CA19-9 | Ki-67 |    |
|------------------------------------------------------|-----------|----------------|-------------|------------------|-------------------|------------|--------------|-------------------|------|----------|--------|--------|-------|----|
|                                                      |           |                |             |                  |                   |            |              | Low               | High | Invasive |        |        |       |    |
| hESC                                                 | 5/8       | -              | 5/5         | 0/5              | 0/5               | 0/5        | 0/5          | 0/5               | 0/5  | 0/5      | -      | -      | +     |    |
| KRAS <sup>G12D</sup> w/o Dox                         | 2/3       | No: 2/2        | 2/2         | 0/2              | 0/2               | 0/2        | 0/2          | 0/2               | 0/2  | 0/2      | -      | -      | +     |    |
| KRAS <sup>G12D</sup>                                 | 7/11      | Yes: 4/7       | 0/4         | 2/4              | 1/4               | 1/4        | 0/4          | 1/4               | 2/4  | 1/4      | ++     | ++     | ++    |    |
|                                                      |           | No: 3/7        | 3/3         | 0/3              | 0/3               | 0/3        | 0/3          | 0/3               | 0/3  | 0/3      | -      | -      | -     |    |
| CDKN2A <sup>KO/KO</sup> KRAS <sup>G12D</sup> w/o Dox | 6/6       | No: 6/6        | 3/6         | 2/6              | 1/6               | 0/6        | 0/6          | 0/6               | 3/6  | 0/6      | 0/6    | +      | +     | ++ |
| CDKN2A <sup>KO/KO</sup> KRAS <sup>G12D</sup>         | 7/7       | Yes: 6/7       | 0/6         | 0/6              | 0/6               | 0/6        | 6/6          | 0/6               | 0/6  | 6/6      | -      | -      | +++   |    |
|                                                      |           | No: 1/7        | 0/1         | 0/1              | 1/1               | 0/1        | 0/1          | 0/1               | 1/1  | 0/1      | 0/1    | -      | -     | ++ |
| GNAS <sup>R201H</sup> w/o Dox                        | 3/5       | No: 3/3        | 2/3         | 1/3              | 0/3               | 0/3        | 0/3          | 0/3               | 0/3  | 0/3      | 0/3    | -/+    | -/+   | ++ |
| GNAS <sup>R201H</sup>                                | 9/12      | Yes: 8/9       | 1/8         | 6/8              | 1/8               | 0/8        | 0/8          | 0/8               | 6/8  | 0/8      | 0/8    | +      | +     | ++ |
|                                                      |           | No: 1/9        | 0/1         | 0/1              | 1/1               | 0/1        | 0/1          | 0/1               | 1/1  | 0/1      | 0/1    | +      | -     | -  |

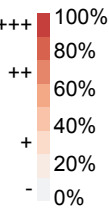

## B

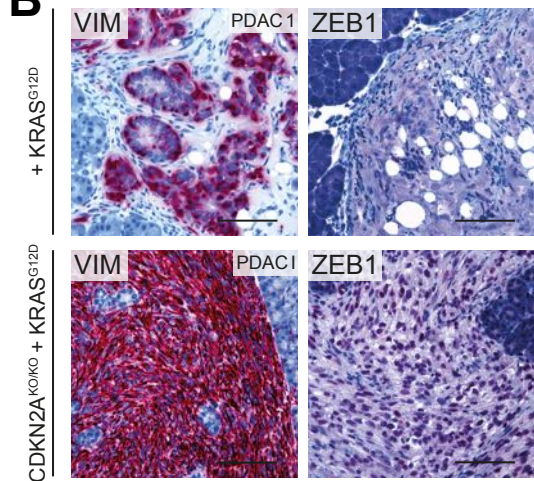

## C

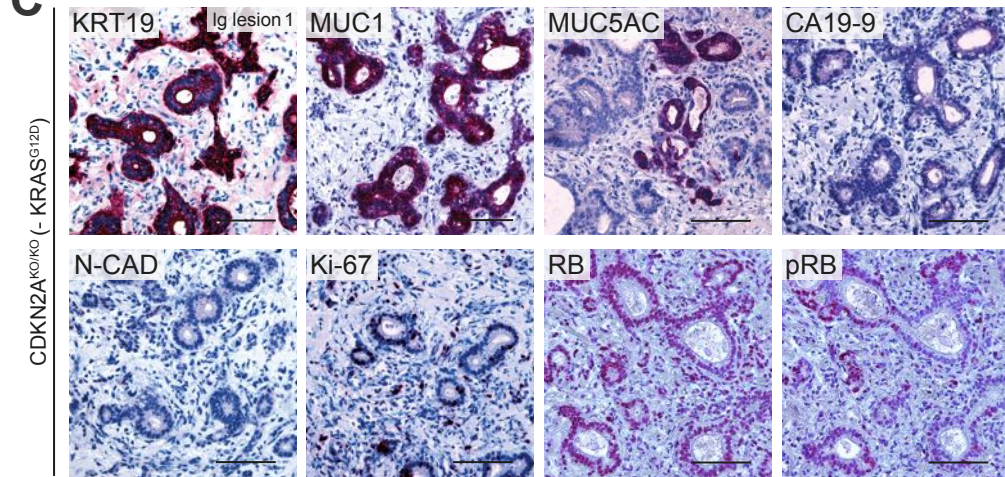

## D

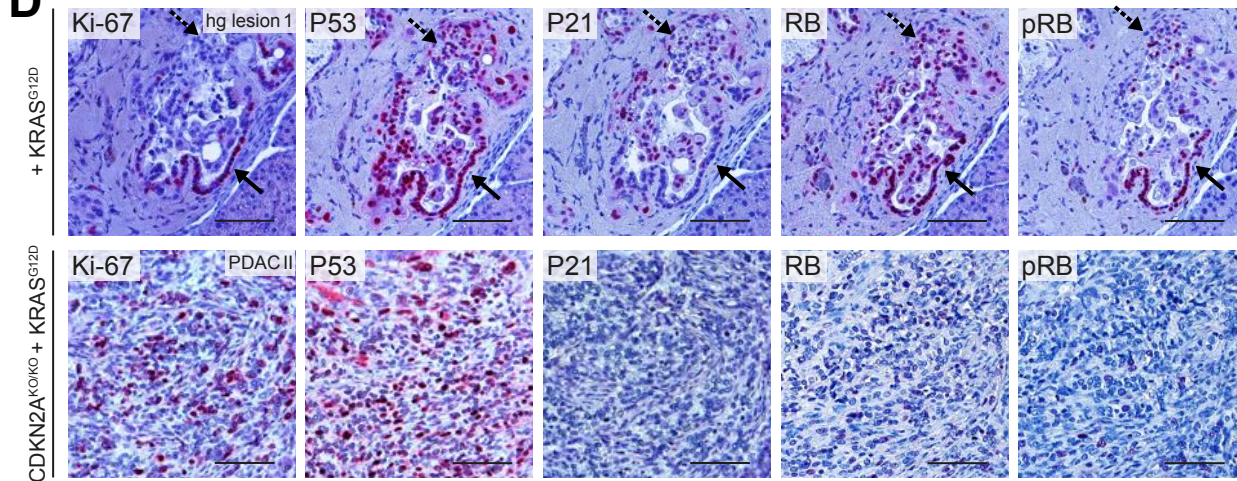

## E

Mutations with high annotation impact  
CDKN2A<sup>KO/KO</sup> + KRAS<sup>G12D</sup>  
(PDAC II)

*TP53\_c.280T>C*  
*ETV6\_c511delC*  
*FGFR1\_c.2142-2A>T*  
*KMT2C\_c.2447dupA*  
*MAP3K14\_n.763+1dupC*  
*MEN1\_c.460A>T*  
*MSH6\_c.3367G>T*  
*SETBP1\_c.681\_682insTCTT*

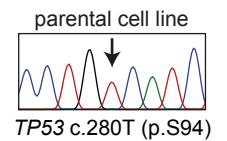

## F

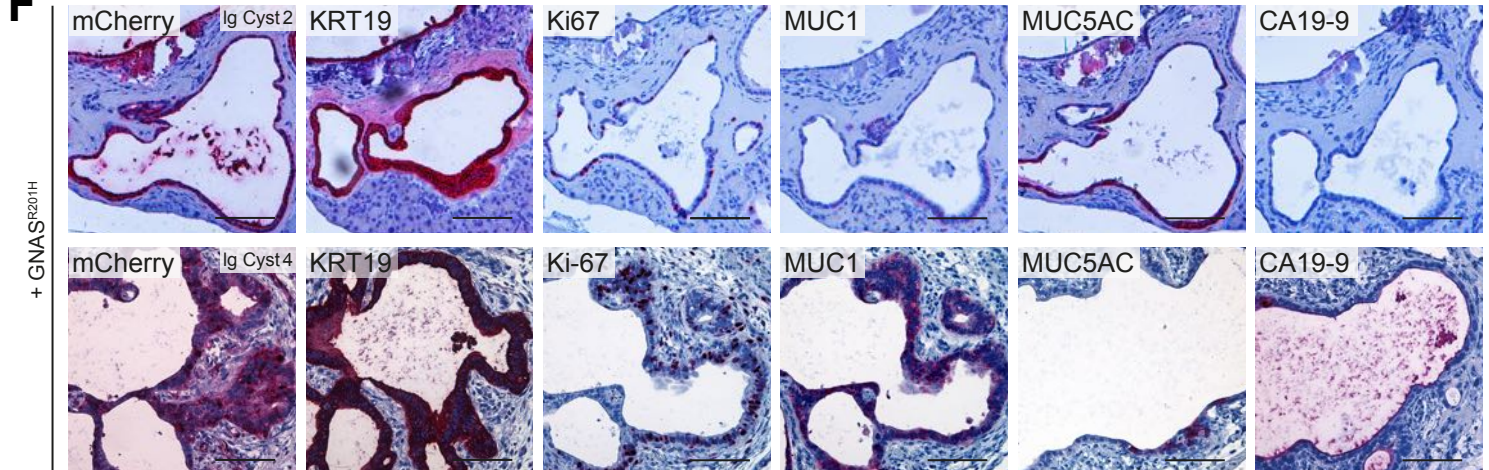



## Supplemental Figure Legends

### Supplemental Figure 1. Engineering PDLOs from human pluripotent stem cells

**(A)** Overview of positively and negatively tested compounds during protocol development. **(B,C)** Compound selection in an exemplary screen for phase II. **(B)** Bar graph of tested compounds: Activin A (1: 100 ng/ml, 2: 20 ng/ml, 3: 4 ng/ml), ALK5i-II (1: 5  $\mu$ M, 2: 1  $\mu$ M, 3: 0.2  $\mu$ M), Avagacestat (1: 10  $\mu$ M, 2: 2  $\mu$ M, 3: 0.5  $\mu$ M), Axitinib (1: 5  $\mu$ M, 2: 1  $\mu$ M, 3: 0.2  $\mu$ M), BMP-4 (1: 50 ng/ml, 2: 10 ng/ml, 3: 2 ng/ml), BMP-7 (1: 50 ng/ml, 2: 10 ng/ml, 3: 2 ng/ml), CHIR99021 (1: 10  $\mu$ M, 2: 2  $\mu$ M, 3: 0.4  $\mu$ M), Dexamethasone (1: 2.5  $\mu$ M, 2: 0.5  $\mu$ M, 3: 0.1  $\mu$ M), Follistatin (1: 500 ng/ml, 2: 100 ng/ml, 3: 20 ng/ml), IL-V (1: 1650 nM, 2: 330 nM, 3: 66 nM), IWP2 (1: 10  $\mu$ M, 2: 2  $\mu$ M, 3: 0.4  $\mu$ M), KGF (1: 100 ng/ml, 2: 20 ng/ml, 3: 4 ng/ml), LDN-193189 (1: 1  $\mu$ M, 2: 0.2  $\mu$ M, 3: 0.04  $\mu$ M), MSC2530818 (1: 1  $\mu$ M, 2: 0.2  $\mu$ M, 3: 0.05  $\mu$ M), RA (1: 10  $\mu$ M, 2: 2  $\mu$ M, 3: 0.4  $\mu$ M), Synthaxin (1: 500 ng/ml, 2: 100 ng/ml, 3: 20 ng/ml), TGF- $\beta$  (1: 5 ng/ml, 2: 1 ng/ml, 3: 0.2 ng/ml), VEGF-164 (1: 100 ng/ml, 2: 20 ng/ml, 3: 4 ng/ml). **(C)** Dynamic profiles of selected compounds that are not used in the current PDLO protocol. Dynamic marker profiles were interpolated from qPCR data using MODDE software. **(D)** Promising compounds like VEGF-164 and Axitinib had been tested in additional experiments and only compounds, which consistently improved morphology and marker expression, were applied in the current protocol. **(E-G)** Positively tested compounds in phase I and phase II complementary to **Fig.1**. **(E)** mRNA expression of selected differentiation markers in PDLOs after treatment with different concentrations of key compounds compared to PPs. Compounds were tested during phase I and II, KGF\* only during phase I. Concentration: 0-50  $\mu$ M ZnSO<sub>4</sub>, 0-250 ng/ml FGF10, 0-250 ng/ml EGF, 0-250 ng/ml KGF\*, 10 ng/ml KGF. Dashed lines indicate expression level of markers reached with the finally chosen concentrations. **(F)** BF images of PDLO cultures at day 30 after KGF titration in phase I. **(G)** BF images of ZnSO<sub>4</sub> titration in phase I and II. **(H)** Plotting all identified genes from the GO term "Canonical WNT signaling" (GO:0060070) at PP and PTrLO stage from RNA-seq experiments with or without MSC2530818 treatment in phase I (d13-20). Scale bar: 100  $\mu$ m. Representative bright field images and dynamic profiles of one experiment performed in technical duplicates (two wells per condition) are displayed as Mean $\pm$ SD.



### Supplemental Figure 2. PDLOs recapitulate cell type-specific features

**(A)** Quantification of IHC staining in PDLOs and PDAC tumor organoids (Panc163) with exemplary staining of KRT19 and KRT7 (PDLO: n=4, Panc163: n=1, Mean±SEM). **(B)** Exemplary FC plots related to **Fig.2D**. **(C)** IF staining for non-pancreatic marker SOX2, and non-ductal markers amylase (AMY2A), glucagon (GCG), and C-peptide (C-pep) confirming lineage-specificity of the ductal protocol. **(D)** FC analysis of GCG and C-pep. Error bars depict Mean±SEM; d30/45/73: n=3; d20/Panc163/positive control (*in vitro* hPSC-derived polyhormonal endocrine cells): n=2. **(E-I)** Phenotypic and functional characterization of PDLOs generated from a control iPSC line and the ESC line H1 demonstrating transferability of the differentiation protocol to other hPSC lines. **(E,F)** IF staining panel of pancreatic transcription factors and structural proteins in PDLOs recapitulating pancreatic duct-specific cellular features comparable to **Fig.2C,E,F**. **(G,H)** CA and CFTR activity assays indicate ductal functionality of hPSC-derived PDLOs. Right: Representative BF images before and after stimulation in the CFTR assay. **(I)** Ki-67 FC analysis of PDLO cells after performing the CFTR assay with no obvious increase in proliferation in the FSK + IBMX group. All scale bars: 100 μM, insets in the left bottom corner are 4x enlarged. If not stated otherwise, PDLOs represent day 30. **G,H,I:** Error bars depict Mean±SEM; n=3; ordinary one-way Anova followed by Sidak's multiple comparison test.

### **Supplemental Figure 3. Global transcriptomic and proteomic analyses confirm ductal identity**

**(A)** Cell type deconvolution of PDLOs (d30) and primary ducts calculating similarity scores for the respective samples to the different pancreatic cell types (Enge et al., 2017) based on a recently published algorithm (Frishberg et al., 2019). **(B,C,F,G)** RNA-seq overrepresentation analysis to identify enriched and depleted reference data sets from common databases (KEGG, Reactome, Gene Ontology (GO), BioCharta). **(B,C)** Enriched and depleted gene sets in PDLOs (d30; B) or primary ducts (C) over PPs (d13). **(D, E)** GSEA of PDLOs (d30) and primary ducts against PPs using gene sets from the hallmark database (h.all.v7.0.symbols; D) or gene sets from ductal subpopulations (E) identified in Qadir et al. (2020). PDLOs were enriched for four out of six gene sets. **(F)** Enriched and depleted gene sets in d59 vs d30 of differentiation. **(G)** Gene sets enriched in primary ducts over PDLOs. **(H-J)** Global protein characterization of PDLOs complementing **Fig.3H-N**. **(H)** Pearson Correlation of log<sub>2</sub> RNA read counts and log<sub>2</sub> protein intensities on PPs (d13) and PDLOs (d59). **(I)** Depleted protein sets in PDLOs over PPs. Overrepresentation analysis was performed against common gene set databases (KEGG, Reactome, GO, BioCharta). **(J)** Exemplary heatmap of the in (I) depleted protein data set “Developmental Biology”.



**Supplemental Figure 4. Development of human duct-like tissue after xenotransplantation of PDLOs**

**(A)** Experimental setup and timeline of PP or PDLO transplantation into the anterior chamber of the mouse eye (ACE). Images show grafts right after injection onto the iris. **(B)** CD31-positive endothelial cells surrounding grafts from PPs or PDLOs five weeks post transplantation. Scale bar: 50  $\mu\text{m}$  for overview, 10  $\mu\text{m}$  for higher magnification. **(C)** Longitudinal live imaging *in vivo* over five weeks post transplantation. Left: Overview of the eye with tracked PDLO (dashed rectangle) at the beginning (d0) and end (d40) of the experiment. Right: Images show maximum intensity projections (MIP) of backscatter signal of a single PDLO engraftment (dashed circle) and blood vessels (red) in the ACE visualized by i.v. injection of FITC-Dextran. Cells with high backscatter signal are highly granulated cells. Bottom right: YZ-plane showing development of a large cell-free lumen within the engrafted PDLO. **(D)** Orthotopic transplantation of CDKN2A<sup>KO/KO</sup> hESC-derived PDLOs. Formation of CFTR- and MUC1-positive subpopulations in such PDLO grafts (H-NUCL, human nucleoli). **(E)** IF staining of human untransformed ducts from a pancreatic biopsy. Scale bar: 500  $\mu\text{m}$  for overview. All scale bars: 100  $\mu\text{m}$ , if not stated otherwise.

### Supplemental Figure 5. KRAS<sup>G12D</sup> expression induces lumen-filling and EMT in PDLOs

**(A,B)** *CDKN2A* gene KO in hESCs by CRISPR/Cas9 gene editing. **(A)** Strategy for creating a large deletion in the *CDKN2A* locus using CRISPR/Cas9. The schema displays the positions of guide RNAs, as well as external and internal primers used for KO validation by PCR. **(B)** Cells were clonally expanded and screened by PCR with an internal and external primer pair detecting the WT and mutated target region, respectively. The external PCR only amplifies a product if the desired deletion has occurred. Successful identification of targeted hESC clones with heterozygous or homozygous loss of *CDKN2A*. **(C-P)** Further characterization of PDLOs differentiated from vector control, KRAS<sup>G12D</sup> and *CDKN2A*<sup>KO/KO</sup> KRAS<sup>G12D</sup> transgenic lines. **(C)** Titration of Dox concentration to activate the expression of HA-tagged KRAS<sup>G12D</sup> transgene. FC analysis of mCherry and HA-Tag expression after 9 days showed robust transgene induction in PDLOs with 5 µg/ml Dox (n=1). **(D)** Functionality of the cloned KRAS<sup>G12D</sup> construct with and without HA-tag was verified by active-KRAS pull-down assay and subsequent Western Blot. GTP was added in additional controls to activate endogenous KRAS. KRAS\*: KRAS<sup>G12D</sup>. **(E)** Western Blot analysis confirmed the dose-dependent increase in transgene expression as well as phosphorylation of the KRAS downstream target pERK. **(F)** PDLO size measured by image-based area quantification after 2, 5, 7, and 9 days with and without Dox treatment of PDLOs. Size change is shown relative to d2 (n=3). **(G)** Continuous decrease of replicating cells in PLDOs treated with increasing doses of Dox, assessed by EdU-based FC analysis (n=1, in technical duplicates). **(H)** Representative plots of FC analysis to determine cell cycle stages and proliferation of PDLOs after EdU incorporation. **(I,J)** Quantification of western blot analyses representatively shown in **Fig.5G**. **(I)** Protein expression was normalized to a housekeeping protein and relative expression to untreated samples is displayed. P21 (n≥4); P16 (n≥2); P15 (n≥3). **(J)** pRB relative protein expression is shown after normalization to total RB (n=4). **(K)** Pro-apoptotic *BAX* was upregulated on mRNA level in *CDKN2A*<sup>KO/KO</sup> KRAS<sup>G12D</sup> PDLOs (n=3). **(L)** Western Blot detection of apoptosis-associated cleaved PARP and respective quantification (n≥2). **(M)** Heatmap illustrating mRNA expression of EMT-associated genes in a KRAS<sup>G12D</sup> (Dox) titration qPCR experiment (n=1). **(N)** Western Blot analysis of KRAS and EMT-associated marker after Dox titration in *CDKN2A*<sup>KO/KO</sup> and *CDKN2A*<sup>WT/WT</sup> KRAS<sup>G12D</sup> PDLOs (n=1). **(O)** Quantification of western blot analyses representatively shown in **Fig.5K**. E-CAD, N-CAD, VIM (n≥4). **(P)** IF staining of PDLOs for epithelial and mesenchymal (N-CAD, N-Cadherin) markers. Scale bar: 10 µm. For all subfigures: Error bars depict Mean±SEM. Only significant comparisons are depicted. F,J,K: Ordinary two-way Anova with Sidak's multiple comparison test. I,L,O: Ordinary one-way Anova with Tukey's multiple comparison test.

**Supplemental Figure 6. McCune-Albright syndrome-derived and  $GNAS^{R201H}$  overexpressing PDLOs form large cysts** (A) Reprogramming of a mixed culture of  $GNAS^{WT/WT}$  and  $GNAS^{WT/R201C}$  cells from an MAS patient. (i) BF images of MAS patient-derived human bone marrow stromal cells (HBMSCs), (ii) overlay with fluorescence signal from hOKSM-dTomato reprogramming virus, and (iii) pre-iPSC colony formed on REF feeder layer. (B) IF staining of MAS-iPSC colonies for pluripotency markers (OCT4, Octamer-binding transcription factor 4; NANOG, Homeobox protein NANOG; SSEA4; Stage-specific embryonic antigen-4). (C) Representative FC plots demonstrating efficient differentiation of both  $GNAS^{WT/WT}$  and  $GNAS^{WT/R201C}$  iPSCs to  $PDX1^+/NKX6-1^+$  PPs (d13). (D) IF staining of PDLOs revealing homogeneous SOX9 expression irrespective of their  $GNAS$  genotype. (E) Representative FC plots acquired to analyze cell proliferation of PDLOs based on EdU incorporation. (F) FC-based quantification of mCherry reporter expression indicative for robust transgene induction after Dox treatment in hESCs (1-2 days) and respective PDLOs (9 days) harboring a *piggyBac* vector control or  $GNAS^{R201H}$  expression cassette (n=2, except  $GNAS^{R201H}$  hESC: n=3). (G) PDLO size measured by image-based area quantification after 2, 5, 7, and 9 days with and without Dox treatment of PDLOs. Size change is shown relative to d2 (n=3). (H) Quantification of cAMP assay performed with  $GNAS^{R201H}$  hESCs or PDLOs displaying upregulation of cAMP levels upon Dox-induced oncogene expression. FSK was added as positive control to stimulate cAMP production (n=1 in technical triplicates). All scale bars: 50  $\mu$ M. Error bars depict Mean $\pm$ SEM; G: ordinary two-way Anova with Sidak's multiple comparison test.



### Supplemental Figure 7. Mutation-dependent PDAC- or IPMN-like tumor formation from PDLO grafts

**(A)** Summary of engraftment types resulting from orthotopically transplanted PDLOs after eight weeks. Cellular atypia and tissue dysplasia were carefully examined to allow grading into normal duct, low- or high-grade lesion, and invasive cancer. Grafts were classified according to the highest grade of lesion found within one graft. Marker (MUC5AC, CA19-9, Ki-67) expression was averaged over individual grafts of each genotype (–, completely or nearly absent; +, weak expression; ++, moderate expression; +++, strong expression). **(B)** IHC staining confirming a well-differentiated PDAC phenotype after KRAS<sup>G12D</sup> induction alone and an almost completely undifferentiated PDAC phenotype after KRAS<sup>G12D</sup> induction in CDKN2A<sup>KO/KO</sup> PDLO grafts (ZEB1, Zinc finger E-box binding homeobox 1). **(C)** Increased tumor marker expression (MUC5AC) in well-differentiated CDKN2A<sup>KO/KO</sup> PDLO-derived grafts without KRAS induction. **(D)** Staining of cell cycle-associated proteins in respective tumor sites depicted in **Fig.7B** (hg lesion 1, PDAC II). Very few P21 positive cells could be detected in the tumor derived from CDKN2A<sup>KO/KO</sup> KRAS<sup>G12D</sup> PDLO grafts. As complementary mechanism to hyperphosphorylation of RB indicated for PDAC I in **Fig.7E**, RB protein appeared downregulated in CDKN2A<sup>KO/KO</sup> KRAS<sup>G12D</sup>-derived PDAC II. Arrows in hg lesion 1 highlight a proliferative region, while dashed arrows depict a region with mainly intact P53/P21 and RB/pRB checkpoint control resulting in very low proliferation. **(E)** Panel-sequencing of CDKN2A<sup>KO/KO</sup> KRAS<sup>G12D</sup> PDAC II. All mutations, which were predicted to be likely pathogenic are shown. Of note, we detected an as pathogenic described P53<sup>S94P</sup> missense mutation with 25% allele frequency. **(F)** IHC staining of two GNAS<sup>R201H</sup> grafts supporting IPMN-like tumor formation in GNAS<sup>R201H</sup> grafts and revealing heterogeneity in MUC5AC and CA19-9 expression between different cysts. Overview HE staining of these grafts are shown in **Fig.7H**. Scale bar: 100 μM, except for HE staining. Scale bar in HE overviews: 500 μm; in insets: 50 μm.

**Supplemental Table 1. Copy number variations identified in PDAC1, PDACI, and III using ICGWS**  
Please refer to separate Excel sheet.

**Supplemental Table 2. Point mutations identified in PDACII using a targeted sequencing approach**  
Please refer to separate Excel sheet.

**Supplemental Table 3. Primers used in this study for cloning of plasmids**

| Primer                                                | Sequence                                                   |
|-------------------------------------------------------|------------------------------------------------------------|
| attB1-SpeI-HindIII-(N-HA)-KRAS <sup>G12D</sup> -fwd   | aaaaagcaggcttcactagtgtctttcataagcttatgtatccatgatgtgcccgact |
| attB2-KRAS <sup>G12D</sup> -rev                       | agaaagctgggtgtgacacacattccacagggt                          |
| attB1-SpeI-HindIII-GNAS(EE) <sup>R201H</sup> -fwd_new | aaaaagcaggcttcactagtgtctttcataagcttatgggctgcctcggaac       |
| attB2-GNAS <sup>R201H</sup> -rev_new                  | agaaagctgggtgttagagcagctcgactgacg                          |
| attB1-Luc2-for                                        | aaaaagcaggcttcgccaccatggaagatgcaaaa                        |
| attB2-Luc2-rev                                        | agaaagctgggtgttacacggcgatcttgccgccttc                      |
| PB-seq-fwd                                            | agctcgtttagtgaaccgtcagatc                                  |
| PB-seq-rev                                            | gtacaagaaagctgggt                                          |
| GNAS_AS189-fwd                                        | aatatatgccgaccgagcagg                                      |
| Luc2_AS215-fwd                                        | cgcttgtgtccgattcagtc                                       |

**Supplemental Table 4. Composition of solutions for ion secretion and uptake experiments**

|                                          | Standard<br>HEPES | Na-Free<br>HCO <sub>3</sub> <sup>-</sup> | Standard<br>HCO <sub>3</sub> <sup>-</sup> | NH <sub>4</sub> Cl<br>HCO <sub>3</sub> <sup>-</sup> |
|------------------------------------------|-------------------|------------------------------------------|-------------------------------------------|-----------------------------------------------------|
| NaCl                                     | 130               | -                                        | 115                                       | 95                                                  |
| KCl                                      | 5                 | 5                                        | 5                                         | 5                                                   |
| MgCl <sub>2</sub>                        | 1                 | 1                                        | 1                                         | 1                                                   |
| CaCl <sub>2</sub>                        | 1                 | 1                                        | 1                                         | 1                                                   |
| Hepes                                    | 10                | -                                        | -                                         | -                                                   |
| Glucose                                  | 10                | 10                                       | 10                                        | 10                                                  |
| NaHCO <sub>3</sub> <sup>-</sup>          | -                 | -                                        | 25                                        | 25                                                  |
| EGTA                                     | -                 | -                                        | -                                         | -                                                   |
| NH <sub>4</sub> Cl                       | -                 | -                                        | -                                         | 20                                                  |
| NMDG                                     | -                 | 115                                      | -                                         | -                                                   |
| Choline<br>HCO <sub>3</sub> <sup>-</sup> | -                 | 25                                       | -                                         | -                                                   |
| Atropine                                 | -                 | 0.01                                     | -                                         | -                                                   |

**Supplemental Table 5. Self-designed or commercially available qPCR primers used in this study**

| Gene         | Forward primer sequence (fwd) | Reverse primer sequence (rev) | QuantiTect Cat# |
|--------------|-------------------------------|-------------------------------|-----------------|
| <i>ALB</i>   | -                             | -                             | QT00063693*     |
| <i>AMY2A</i> | -                             | -                             | QT01680595*     |
| <i>BAX</i>   | tggagctgcagaggatgattg         | gaagttgccgtcagaaaacatg        |                 |
| <i>CFTR</i>  | -                             | -                             | QT00070007*     |

|               |                          |                         |             |
|---------------|--------------------------|-------------------------|-------------|
| <i>FN1</i>    | -                        | -                       | QT00038024* |
| <i>GCG</i>    | -                        | -                       | QT00091756* |
| <i>HMBS</i>   | -                        | -                       | QT00494130* |
| <i>INS</i>    | -                        | -                       | QT01531040* |
| <i>KRAS</i>   | -                        | -                       | QT00083622* |
| <i>KRT19</i>  | ctacagccactactacacgac    | cagagcctgttccgtctcaaa   |             |
| <i>KRT7</i>   | ggagccgtgaatatctctgtga   | tgcggtccggatggaataag    |             |
| <i>N-CAD</i>  | -                        | -                       | QT00063196* |
| <i>NKX6-1</i> |                          |                         | QT00092379* |
| <i>P21</i>    | gcgcatgtcagaaccgcct      | gcaggcttctgtggcgga      |             |
| <i>PDX1</i>   | -                        | -                       | QT00201859* |
| <i>PTF1A</i>  | -                        | -                       | QT01033396* |
| <i>RELA</i>   | atagaagagcagcgtgggga     | ttgggggcacgattgtcaaa    |             |
| <i>SLUG</i>   | cagtgattttccccgtatc      | ccccaaagatgaggagtatc    |             |
| <i>SNAIL</i>  | gctccttcgtccttctcctc     | tgacatctgagtggtctgg     |             |
| <i>SOX4</i>   | -                        | -                       | QT00220605* |
| <i>SOX9</i>   | -                        | -                       | QT00001498* |
| <i>TWIST1</i> | ctagatgtcattgtttccagag   | ccctgtttcttgaatttg      |             |
| <i>VIM</i>    | gacaatgcgtctctggcacgtctt | tcctccgcctcctgcaggttctt |             |
| <i>ZEB1</i>   | aaagatgatgaatgcgagtc     | tccatttcatcatgaccac     |             |

\*Primer sequences for commercial Qiagen primers are not available.

**Supplemental Table 6. IHC/IF conditions for antibodies used in this study**

| Embedding | Antibody    | Species | Company                 | Catalogue no. | Condition | Dilution |
|-----------|-------------|---------|-------------------------|---------------|-----------|----------|
| paraffin  | ActTUB      | rabbit  | Abcam                   | ab179484      | MW Citrat | 1000     |
| paraffin  | AMY2A       | rabbit  | Sigma                   | A8273-1VL     | MW Citrat | 300      |
| paraffin  | C-pep       | rabbit  | Cell Signaling          | 4593          | MW Citrat | 100      |
| paraffin  | CA19-9      | mouse   | Thermo                  | 116-NS-19-9   | MW Citrat | 500      |
| paraffin  | CDX2        | rabbit  | Cell Marque -<br>RabMab | MU392-UC      | MW Citrat | 500      |
| paraffin  | CFTR        | mouse   | R&D                     | MAB1660       | ST Tris   | 200      |
| paraffin  | CLDN1       | rabbit  | Abcam                   | ab15098       | ST Tris   | 100      |
| paraffin  | E-CAD       | mouse   | Dako                    | M3612         | PC Citrat | 100      |
| paraffin  | E-CAD       | mouse   | BD Bioscience           | 610182        | MW Citrat | 1000     |
| paraffin  | GCG         | mouse   | Sigma                   | G2654         | MW Citrat | 500      |
| paraffin  | GFP         | rabbit  | Thermo                  | A6455         | No AGR    | 1500     |
| paraffin  | H-NUCL      | mouse   | Abcam                   | ab190710      | MW Citrat | 200      |
| paraffin  | HA-Tag      | rabbit  | Cell Signaling          | 3724          | MW Citrat | 500      |
| paraffin  | HNF1B       | mouse   | Abcam                   | ab236759      | MW Citrat | 100      |
| paraffin  | Ki-67       | rabbit  | Thermo                  | MA5-14520     | MW Citrat | 100      |
| paraffin  | Ki-67       | mouse   | Dako                    | M7240         | MW Citrat | 200      |
| paraffin  | KRT19 (IF)  | mouse   | Dako                    | M0888         | MW Citrat | 100      |
| paraffin  | KRT19 (IHC) | mouse   | Dako                    | M0888         | Pronase   | 100      |
| paraffin  | KRT7 (IF)   | mouse   | Dako                    | M7018         | MW Citrat | 200      |

|          |            |        |                |                      |                      |      |
|----------|------------|--------|----------------|----------------------|----------------------|------|
| paraffin | KRT7 (IHC) | mouse  | Dako           | M7018                | Pronase              | 200  |
| paraffin | KRT8       | mouse  | BD Bioscience  | 345779               | ST Tris              | 100  |
| paraffin | mCherry    | rabbit | Abcam          | ab167453             | No AGR               | 500  |
| paraffin | MUC1       | mouse  | Santa Cruz     | sc-7313              | MW Citrat            | 100  |
| paraffin | MUC5AC     | mouse  | Santa Cruz     | sc-33667             | MW Citrat            | 50   |
| paraffin | N-CAD      | rabbit | Cell Signaling | 13116                | MW Citrat or ST Tris | 100  |
| paraffin | NKX6-1     | mouse  | DSHB Hybridoma | F55A12 (concentrate) | MW Citrat            | 150  |
| paraffin | P21        | rabbit | Abcam          | ab109520             | MW Citrat            | 300  |
| paraffin | P53        | mouse  | Santa Cruz     | sc-47698             | MW Citrat            | 100  |
| paraffin | PDX1       | goat   | R&D            | AF2419               | MW Citrat            | 500  |
| paraffin | PKC        | rabbit | Abcam          | ab59364              | MW Citrat            | 200  |
| paraffin | pRB        | rabbit | Cell Signaling | 8516                 | ST Citrat            | 200  |
| paraffin | RB         | mouse  | Cell Signaling | 9309                 | ST Citrat            | 400  |
| paraffin | SOX9       | rabbit | Millipore      | AB5535               | MW Citrat            | 500  |
| paraffin | Turbo GFP  | Rabbit | Thermo         | PA5-22688            | ST Tris              | 250  |
| paraffin | VIM        | rabbit | Cell Signaling | 5741S                | MW Citrat            | 500  |
| paraffin | Zeb1       | rabbit | Santa Cruz     | sc-25388             | PC Citrat            | 300  |
| paraffin | ZO1        | mouse  | Thermo         | 33-9100              | MW Citrat            | 500  |
| cryo     | C-pep      | rabbit | Cell Signaling | #4593                | No AGR               | 100  |
| cryo     | CD31       | rat    | BD Bioscience  | 557355               | No AGR               | 100  |
| cryo     | CTRC       | mouse  | Millipore      | MAB1476              | No AGR               | 1200 |
| cryo     | GCG        | mouse  | Sigma          | G2654                | No AGR               | 500  |
| cryo     | E-CAD      | rabbit | Cell Signaling | 3195                 | No AGR               | 200  |
| cryo     | KRT7       | mouse  | Dako           | M7018                | No AGR               | 200  |
| cryo     | KRT8       | mouse  | BD Bioscience  | 345779               | No AGR               | 100  |
| cryo     | KRT19      | mouse  | Dako           | M0888                | No AGR               | 100  |
| cyro     | CFTR       | rabbit | Alomone        | ACL-006              | HB 94°C Citrat/Tween | 200  |
| cyro     | Occludin   | mouse  | Thermo         | 33-1500              | HB 94°C Citrat/Tween | 200  |

\*MW, microwave; No AGR, no antigen retrieval; PC, pressure cooker; ST, steamer; HB, heating block;

### Supplemental Table 7. Reference gene sets used within this study

Please refer to separate Excel sheet.



## Supplemental Item Legends

### Supplemental Table 1. Copy number variations identified in PDAC 1, PDAC I, and III using lcWGS

Related to **Fig.7F** (Results)

CNV with a  $\log_2\text{ratio} \geq 10.751$  are depicted.

### Supplemental Table 2. Point mutations identified in PDAC II using a targeted sequencing approach

Related to **Suppl.Fig.7E** (Results)

Point mutations identified in a comprehensive cancer panel (Qiagen). Variants marked in red are not reliable, as clarified in the “tag-defs” spreadsheet.

### Supplemental Table 3. Primers used in this study for cloning of plasmids

Related to “*All-in-One piggyBac-system and Nucleofection*” (Methods)

### Supplemental Table 4. Composition of solutions for ion secretion and uptake experiments

Related to “*pH measurements via fluorescence microscopy*” (Methods)

### Supplemental Table 5. Self-designed or commercially available qPCR primers used in this study

Related to “RNA isolation, reverse transcription and qPCR” (Methods)

\*Primer sequences for commercial Qiagen primers are not available.

### Supplemental Table 6. IHC/IF conditions for antibodies used in this study

Related to “IF and IHC staining” (Methods)

\*MW, microwave; ST, steamer; PC, pressure cooker

### Supplemental Table 7. Reference gene sets used within this study

Related to “Gene set enrichment analysis” (Methods)

### Video S1. Live-cell imaging of CDKN2A<sup>KO/KO</sup> KRAS<sup>G12D</sup> PDLOs w/o Dox stimulation

Related to **Fig.5.M**

Time-lapse video of PDLO culture monitored every 3 h over 4 days. The frame rate was 5 frames per second (fps).

### Video S2. Live-cell imaging of CDKN2A<sup>KO/KO</sup> KRAS<sup>G12D</sup> PDLOs + Dox stimulation

Related to **Fig.5.M**

Time-lapse video of PDLO culture monitored every 3 h over 4 days. The frame rate was 5 frames per second (fps) and the red mCherry fluorescence signal indicates KRAS<sup>G12D</sup> expression.

## Supplemental Item Legends

### Supplemental Table 1. Copy number variations identified in PDAC 1, PDAC I, and III using lcWGS

Related to **Fig.7F** (Results)

CNV with a  $\log_2\text{ratio} \geq 10.751$  are depicted.

### Supplemental Table 2. Point mutations identified in PDAC II using a targeted sequencing approach

Related to **Suppl.Fig.7E** (Results)

Point mutations identified in a comprehensive cancer panel (Qiagen). Variants marked in red are not reliable, as clarified in the “tag-defs” spreadsheet.

### Supplemental Table 3. Primers used in this study for cloning of plasmids

Related to “*All-in-One piggyBac-system and Nucleofection*” (Methods)

### Supplemental Table 4. Composition of solutions for ion secretion and uptake experiments

Related to “*pH measurements via fluorescence microscopy*” (Methods)

### Supplemental Table 5. Self-designed or commercially available qPCR primers used in this study

Related to “RNA isolation, reverse transcription and qPCR” (Methods)

\*Primer sequences for commercial Qiagen primers are not available.

### Supplemental Table 6. IHC/IF conditions for antibodies used in this study

Related to “IF and IHC staining” (Methods)

\*MW, microwave; ST, steamer; PC, pressure cooker

### Supplemental Table 7. Reference gene sets used within this study

Related to “Gene set enrichment analysis” (Methods)

### Video S1. Live-cell imaging of CDKN2A<sup>KO/KO</sup> KRAS<sup>G12D</sup> PDLOs w/o Dox stimulation

Related to **Fig.5.M**

Time-lapse video of PDLO culture monitored every 3 h over 4 days. The frame rate was 5 frames per second (fps).

### Video S2. Live-cell imaging of CDKN2A<sup>KO/KO</sup> KRAS<sup>G12D</sup> PDLOs + Dox stimulation

Related to **Fig.5.M**

Time-lapse video of PDLO culture monitored every 3 h over 4 days. The frame rate was 5 frames per second (fps) and the red mCherry fluorescence signal indicates KRAS<sup>G12D</sup> expression.

## Literature:

Afelik, S., and Jensen, J. (2013). Notch signaling in the pancreas: patterning and cell fate specification. *Wiley interdisciplinary reviews Developmental biology* 2, 531-544.

Afelik, S., Qu, X., Hasrouni, E., Bukys, M.A., Deering, T., Nieuwoudt, S., Rogers, W., Macdonald, R.J., and Jensen, J. (2012). Notch-mediated patterning and cell fate allocation of pancreatic progenitor cells. *Development* 139, 1744-1753.

Aiello, N.M., Brabletz, T., Kang, Y., Nieto, M.A., Weinberg, R.A., and Stanger, B.Z. (2017). Upholding a role for EMT in pancreatic cancer metastasis. *Nature* 547, E7-E8.

Aiello, N.M., Maddipati, R., Norgard, R.J., Balli, D., Li, J., Yuan, S., Yamazoe, T., Black, T., Sahnoud, A., Furth, E.E., *et al.* (2018). EMT Subtype Influences Epithelial Plasticity and Mode of Cell Migration. *Dev Cell* 45, 681-695.e684.

Aiello, N.M., Rhim, A.D., and Stanger, B.Z. (2016). Orthotopic Injection of Pancreatic Cancer Cells. *Cold Spring Harb Protoc* 2016, pdb.prot078360.

Ansieau, S., Bastid, J., Doreau, A., Morel, A.P., Bouchet, B.P., Thomas, C., Fauvet, F., Puisieux, I., Doglioni, C., Piccinin, S., *et al.* (2008). Induction of EMT by twist proteins as a collateral effect of tumor-promoting inactivation of premature senescence. *Cancer Cell* 14, 79-89.

Baron, M., Veres, A., Wolock, S.L., Faust, A.L., Gaujoux, R., Vetere, A., Ryu, J.H., Wagner, B.K., Shen-Orr, S.S., Klein, A.M., *et al.* (2016). A Single-Cell Transcriptomic Map of the Human and Mouse Pancreas Reveals Inter- and Intra-cell Population Structure. *Cell Syst* 3, 346-360 e344.

Bartek, J., Bartkova, J., and Lukas, J. (2007). DNA damage signalling guards against activated oncogenes and tumour progression. *Oncogene* 26, 7773-7779.

Benjamini, Y., and Hochberg, Y. (1995). Controlling the false discovery rate: a practical and powerful approach to multiple testing. *Journal of the Royal statistical society: series B (Methodological)* 57, 289-300.

Bianco, P., Kuznetsov, S.A., Riminucci, M., Fisher, L.W., Spiegel, A.M., and Robey, P.G. (1998). Reproduction of human fibrous dysplasia of bone in immunocompromised mice by transplanted mosaics of normal and Gsalpha-mutated skeletal progenitor cells. *The Journal of clinical investigation* 101, 1737-1744.

Biederstädt, A., Hassan, Z., Schneeweis, C., Schick, M., Schneider, L., Muckenhuber, A., Hong, Y., Siegers, G., Nilsson, L., and Wirth, M. (2020). SUMO pathway inhibition targets an aggressive pancreatic cancer subtype. *Gut*.

Blondel, V.D., Guillaume, J.-L., Lambiotte, R., and Lefebvre, E. (2008). Fast unfolding of communities in large networks. *Journal of statistical mechanics: theory and experiment* 2008, P10008.

Boj, S.F., Hwang, C.I., Baker, L.A., Chio, I., Engle, D.D., Corbo, V., Jager, M., Ponz-Sarvisé, M., Tiriác, H., Spector, M.S., *et al.* (2015). Organoid models of human and mouse ductal pancreatic cancer. *Cell* 160, 324-338.

Boj, S.F., Hwang, C.I., Baker, L.A., Engle, D.D., Tuveson, D.A., and Clevers, H. (2016). Model organoids provide new research opportunities for ductal pancreatic cancer. *Molecular & cellular oncology* 3, e1014757.

Bolger, A.M., Lohse, M., and Usadel, B. (2014). Trimmomatic: a flexible trimmer for Illumina sequence data. *Bioinformatics* 30, 2114-2120.

Brion, L.P., Schwartz, J.H., Zavilowitz, B.J., and Schwartz, G.J. (1988). Micro-method for the measurement of carbonic anhydrase activity in cellular homogenates. *Analytical biochemistry* 175, 289-297.

Burghardt, B., Elkaer, M.L., Kwon, T.H., Racz, G.Z., Varga, G., Steward, M.C., and Nielsen, S. (2003). Distribution of aquaporin water channels AQP1 and AQP5 in the ductal system of the human pancreas. *Gut* 52, 1008-1016.

- Caldwell, M.E., DeNicola, G.M., Martins, C.P., Jacobetz, M.A., Maitra, A., Hruban, R.H., and Tuveson, D.A. (2012). Cellular features of senescence during the evolution of human and murine ductal pancreatic cancer. *Oncogene* *31*, 1599-1608.
- Campisi, J. (2013). Aging, cellular senescence, and cancer. *Annual review of physiology* *75*, 685-705.
- Chan-Seng-Yue, M., Kim, J.C., Wilson, G.W., Ng, K., Figueroa, E.F., O'Kane, G.M., Connor, A.A., Denroche, R.E., Grant, R.C., McLeod, J., *et al.* (2020). Transcription phenotypes of pancreatic cancer are driven by genomic events during tumor evolution. *Nat Genet* *52*, 231-240.
- Chen, Z., Trotman, L.C., Shaffer, D., Lin, H.K., Dotan, Z.A., Niki, M., Koutcher, J.A., Scher, H.I., Ludwig, T., Gerald, W., *et al.* (2005). Crucial role of p53-dependent cellular senescence in suppression of Pten-deficient tumorigenesis. *Nature* *436*, 725-730.
- Chmelova, H., Cohrs, C.M., Chouinard, J.A., Petzold, C., Kuhn, M., Chen, C., Roeder, I., Kretschmer, K., and Speier, S. (2015). Distinct roles of  $\beta$ -cell mass and function during type 1 diabetes onset and remission. *Diabetes* *64*, 2148-2160.
- Cho, C.H., Hannan, N.R., Docherty, F.M., Docherty, H.M., Joao Lima, M., Trotter, M.W., Docherty, K., and Vallier, L. (2012). Inhibition of activin/nodal signalling is necessary for pancreatic differentiation of human pluripotent stem cells. *Diabetologia* *55*, 3284-3295.
- Clevers, H. (2016). Modeling Development and Disease with Organoids. *Cell* *165*, 1586-1597.
- Cogger, K.F., Sinha, A., Sarangi, F., McGaugh, E.C., Saunders, D., Dorrell, C., Mejia-Guerrero, S., Aghazadeh, Y., Rourke, J.L., and Srean, R.A. (2017). Glycoprotein 2 is a specific cell surface marker of human pancreatic progenitors. *Nature Communications* *8*, 1-13.
- Cohrs, C.M., Chen, C., Jahn, S.R., Stertmann, J., Chmelova, H., Weitz, J., Bahr, A., Klymiuk, N., Steffen, A., Ludwig, B., *et al.* (2017). Vessel Network Architecture of Adult Human Islets Promotes Distinct Cell-Cell Interactions In Situ and Is Altered After Transplantation. *Endocrinology* *158*, 1373-1385.
- Cohrs, C.M., Chen, C., and Speier, S. (2020). Transplantation of Islets of Langerhans into the Anterior Chamber of the Eye for Longitudinal In Vivo Imaging. *Methods Mol Biol* *2128*, 149-157.
- Collado, M., Gil, J., Efeyan, A., Guerra, C., Schuhmacher, A.J., Barradas, M., Benguría, A., Zaballos, A., Flores, J.M., Barbacid, M., *et al.* (2005). Senescence in premalignant tumours. *Nature* *436*, 642-642.
- Cox, J., and Mann, M. (2008). MaxQuant enables high peptide identification rates, individualized ppb-range mass accuracies and proteome-wide protein quantification. *Nature biotechnology* *26*, 1367-1372.
- Czodrowski, P., Mallinger, A., Wienke, D., Esdar, C., Pöschke, O., Busch, M., Rohdich, F., Eccles, S.A., Ortiz-Ruiz, M.J., Schneider, R., *et al.* (2016). Structure-Based Optimization of Potent, Selective, and Orally Bioavailable CDK8 Inhibitors Discovered by High-Throughput Screening. *J Med Chem* *59*, 9337-9349.
- Dantes, Z., Yen, H.-Y., Pfarr, N., Winter, C., Steiger, K., Muckenhuber, A., Hennig, A., Lange, S., Engleitner, T., and Öllinger, R. (2020). Implementing cell-free DNA of pancreatic cancer patient-derived organoids for personalized oncology. *JCI insight* *5*.
- de Lichtenberg, K.H., Seymour, P.A., Jørgensen, M.C., Kim, Y.-H., Grapin-Botton, A., Magnuson, M.A., Nakic, N., Ferrer, J., and Serup, P. (2018). Notch Controls Multiple Pancreatic Cell Fate Regulators Through Direct Hes1-mediated Repression. *bioRxiv*, 336305.
- Dekkers, J.F., Wiegerinck, C.L., de Jonge, H.R., Bronsveld, I., Janssens, H.M., de Winter-de Groot, K.M., Brandsma, A.M., de Jong, N.W., Bijvelds, M.J., Scholte, B.J., *et al.* (2013). A functional CFTR assay using primary cystic fibrosis intestinal organoids. *Nature medicine* *19*, 939-945.



- Di Micco, R., Fumagalli, M., Cicalese, A., Piccinin, S., Gasparini, P., Luise, C., Schurra, C., Garre, M., Nuciforo, P.G., Bensimon, A., *et al.* (2006). Oncogene-induced senescence is a DNA damage response triggered by DNA hyper-replication. *Nature* *444*, 638-642.
- Ding, Q., Regan, S.N., Xia, Y., Oostrom, L.A., Cowan, C.A., and Musunuru, K. (2013). Enhanced efficiency of human pluripotent stem cell genome editing through replacing TALENs with CRISPRs. *Cell stem cell* *12*, 393-394.
- Dobin, A., Davis, C.A., Schlesinger, F., Drenkow, J., Zaleski, C., Jha, S., Batut, P., Chaisson, M., and Gingeras, T.R. (2013). STAR: ultrafast universal RNA-seq aligner. *Bioinformatics* *29*, 15-21.
- Enge, M., Arda, H.E., Mignardi, M., Beausang, J., Bottino, R., Kim, S.K., and Quake, S.R. (2017). Single-Cell Analysis of Human Pancreas Reveals Transcriptional Signatures of Aging and Somatic Mutation Patterns. *Cell* *171*, 321-330.e314.
- Ferreira, R.M.M., Sancho, R., Messal, H.A., Nye, E., Spencer-Dene, B., Stone, R.K., Stamp, G., Rosewell, I., Quaglia, A., and Behrens, A. (2017). Duct- and Acinar-Derived Pancreatic Ductal Adenocarcinomas Show Distinct Tumor Progression and Marker Expression. *Cell Rep* *21*, 966-978.
- Frejno, M., Chiozzi, R.Z., Wilhelm, M., Koch, H., Zheng, R., Klaeger, S., Ruprecht, B., Meng, C., Kramer, K., and Jarzab, A. (2017). Pharmacoproteomic characterisation of human colon and rectal cancer. *Molecular systems biology* *13*.
- Frishberg, A., Peshes-Yaloz, N., Cohn, O., Rosentul, D., Steuerman, Y., Valadarsky, L., Yankovitz, G., Mandelboim, M., Iraqi, F.A., Amit, I., *et al.* (2019). Cell composition analysis of bulk genomics using single-cell data. *Nat Methods* *16*, 327-332.
- Fryer, C.J., White, J.B., and Jones, K.A. (2004). Mastermind recruits CycC:CDK8 to phosphorylate the Notch ICD and coordinate activation with turnover. *Mol Cell* *16*, 509-520.
- Furukawa, T., Kloppel, G., Volkan Adsay, N., Albores-Saavedra, J., Fukushima, N., Horii, A., Hruban, R.H., Kato, Y., Klimstra, D.S., Longnecker, D.S., *et al.* (2005). Classification of types of intraductal papillary-mucinous neoplasm of the pancreas: a consensus study. *Virchows Arch* *447*, 794-799.
- Gaujoux, S., Salenave, S., Ronot, M., Rangheard, A.S., Cros, J., Belghiti, J., Sauvanet, A., Ruszniewski, P., and Chanson, P. (2014). Hepatobiliary and Pancreatic neoplasms in patients with McCune-Albright syndrome. *J Clin Endocrinol Metab* *99*, E97-101.
- Georgakopoulos, N., Prior, N., Angres, B., Mastrogiovanni, G., Cagan, A., Harrison, D., Hindley, C.J., Arnes-Benito, R., Liau, S.S., Curd, A., *et al.* (2020). Long-term expansion, genomic stability and in vivo safety of adult human pancreas organoids. *BMC Dev Biol* *20*, 4.
- Gerrard, D.T., Berry, A.A., Jennings, R.E., Piper Hanley, K., Bobola, N., and Hanley, N.A. (2016). An integrative transcriptomic atlas of organogenesis in human embryos. *Elife* *5*.
- Gliwicz, D., Jankowska, I., Wierzbicka, A., Miskiewicz-Chotnicka, A., Lisowska, A., and Walkowiak, J. (2016). Exocrine pancreatic function in children with Alagille syndrome. *Sci Rep* *6*, 35229.
- Gloeckner, C.J., Boldt, K., Schumacher, A., and Ueffing, M. (2009). Tandem affinity purification of protein complexes from mammalian cells by the Strep/FLAG (SF)-TAP tag. In *Proteomics* (Springer), pp. 359-372.
- Golson, M.L., Loomes, K.M., Oakey, R., and Kaestner, K.H. (2009). Ductal malformation and pancreatitis in mice caused by conditional Jag1 deletion. *Gastroenterology* *136*, 1761-1771 e1761.
- Gout, J., Perkhofer, L., Morawe, M., Arnold, F., Ihle, M., Biber, S., Lange, S., Roger, E., Kraus, J.M., Stifter, K., *et al.* (2020). Synergistic targeting and resistance to PARP inhibition in DNA damage repair-deficient pancreatic cancer. *Gut*.

- Grigore, A.D., Jolly, M.K., Jia, D., Farach-Carson, M.C., and Levine, H. (2016). Tumor Budding: The Name is EMT. Partial EMT. *Journal of clinical medicine* 5.
- Haeussler, M., Schonig, K., Eckert, H., Eschstruth, A., Mianne, J., Renaud, J.B., Schneider-Maunoury, S., Shkumatava, A., Teboul, L., Kent, J., *et al.* (2016). Evaluation of off-target and on-target scoring algorithms and integration into the guide RNA selection tool CRISPOR. *Genome Biol* 17, 148.
- Heng, L. (2013). Aligning sequence reads, clone sequences and assembly contigs with BWA-MEM (arXiv).
- Hogrebe, N.J., Augsornworawat, P., Maxwell, K.G., Velazco-Cruz, L., and Millman, J.R. (2020). Targeting the cytoskeleton to direct pancreatic differentiation of human pluripotent stem cells. *Nat Biotechnol*.
- Hohwieler, M., Illing, A., Hermann, P.C., Mayer, T., Stockmann, M., Perkhofer, L., Eiseler, T., Antony, J.S., Muller, M., Renz, S., *et al.* (2017a). Human pluripotent stem cell-derived acinar/ductal organoids generate human pancreas upon orthotopic transplantation and allow disease modelling. *Gut* 66, 473-486.
- Hohwieler, M., Muller, M., Frappart, P.O., and Heller, S. (2019). Pancreatic Progenitors and Organoids as a Prerequisite to Model Pancreatic Diseases and Cancer. *Stem Cells Int* 2019, 9301382.
- Hohwieler, M., Perkhofer, L., Liebau, S., Seufferlein, T., Muller, M., Illing, A., and Kleger, A. (2017b). Stem cell-derived organoids to model gastrointestinal facets of cystic fibrosis. *United European Gastroenterol J* 5, 609-624.
- Hua, H., Zhang, Y.Q., Dabernat, S., Kritzik, M., Dietz, D., Sterling, L., and Sarvetnick, N. (2006). BMP4 regulates pancreatic progenitor cell expansion through Id2. *J Biol Chem* 281, 13574-13580.
- Huang, L., Holtzinger, A., Jagan, I., BeGora, M., Lohse, I., Ngai, N., Nostro, C., Wang, R., Muthuswamy, L.B., Crawford, H.C., *et al.* (2015). Ductal pancreatic cancer modeling and drug screening using human pluripotent stem cell- and patient-derived tumor organoids. *Nature medicine* 21, 1364-1371.
- Huch, M., Gehart, H., van Boxtel, R., Hamer, K., Blokzijl, F., Versteegen, M.M., Ellis, E., van Wenum, M., Fuchs, S.A., de Ligt, J., *et al.* (2015). Long-term culture of genome-stable bipotent stem cells from adult human liver. *Cell* 160, 299-312.
- Ideno, N., Yamaguchi, H., Ghosh, B., Gupta, S., Okumura, T., Steffen, D.J., Fisher, C.G., Wood, L.D., Singhi, A.D., Nakamura, M., *et al.* (2018). GNAS(R201C) Induces Pancreatic Cystic Neoplasms in Mice That Express Activated KRAS by Inhibiting YAP1 Signaling. *Gastroenterology*.
- Illing, A., Stockmann, M., Swamy Telugu, N., Linta, L., Russell, R., Muller, M., Seufferlein, T., Liebau, S., and Kleger, A. (2013). Definitive Endoderm Formation from Plucked Human Hair-Derived Induced Pluripotent Stem Cells and SK Channel Regulation. *Stem Cells International* 2013, 360573.
- Jennings, R.E., Berry, A.A., Kirkwood-Wilson, R., Roberts, N.A., Hearn, T., Salisbury, R.J., Blaylock, J., Piper Hanley, K., and Hanley, N.A. (2013). Development of the human pancreas from foregut to endocrine commitment. *Diabetes* 62, 3514-3522.
- Johnson, W.E., Li, C., and Rabinovic, A. (2007). Adjusting batch effects in microarray expression data using empirical Bayes methods. *Biostatistics* 8, 118-127.
- Kang, J.H., Hwang, S.M., and Chung, I.Y. (2015). S100A8, S100A9 and S100A12 activate airway epithelial cells to produce MUC5AC via extracellular signal-regulated kinase and nuclear factor-kappaB pathways. *Immunology* 144, 79-90.
- Kesavan, G., Sand, F.W., Greiner, T.U., Johansson, J.K., Kobberup, S., Wu, X., Brakebusch, C., and Semb, H. (2009). Cdc42-mediated tubulogenesis controls cell specification. *Cell* 139, 791-801.
- Kim, S.I., Ocegüera-Yanez, F., Sakurai, C., Nakagawa, M., Yamanaka, S., and Woltjen, K. (2016). Inducible Transgene Expression in Human iPS Cells Using Versatile All-in-One piggyBac Transposons. *Methods Mol Biol* 1357, 111-131.

Klausen, P., Kovacevic, B., Toxvaerd, A., Kalaitzakis, E., Karstensen, J.G., Rift, C.V., Hansen, C.P., Storkholm, J., Vilmann, P., and Hasselby, J.P. (2019). Subtyping of intraductal papillary mucinous neoplasms - pitfalls of MUC1 immunohistochemistry. *Apmis* *127*, 27-32.

Koike, H., Iwasawa, K., Ouchi, R., Maezawa, M., Giesbrecht, K., Saiki, N., Ferguson, A., Kimura, M., Thompson, W.L., Wells, J.M., *et al.* (2019). Modelling human hepato-biliary-pancreatic organogenesis from the foregut-midgut boundary. *Nature* *574*, 112-116.

Kopp, J.L., Dubois, C.L., Schaeffer, D.F., Samani, A., Taghizadeh, F., Cowan, R.W., Rhim, A.D., Stiles, B.L., Valasek, M., and Sander, M. (2018). Loss of Pten and Activation of Kras Synergistically Induce Formation of Intraductal Papillary Mucinous Neoplasia From Pancreatic Ductal Cells in Mice. *Gastroenterology* *154*, 1509-1523 e1505.

Kopp, J.L., von Figura, G., Mayes, E., Liu, F.F., Dubois, C.L., Morris, J.P.t., Pan, F.C., Akiyama, H., Wright, C.V., Jensen, K., *et al.* (2012). Identification of Sox9-dependent acinar-to-ductal reprogramming as the principal mechanism for initiation of pancreatic ductal adenocarcinoma. *Cancer Cell* *22*, 737-750.

Korytnikov, R., and Nostro, M.C. (2016). Generation of polyhormonal and multipotent pancreatic progenitor lineages from human pluripotent stem cells. *Methods* *101*, 56-64.

Krentz, N.A.J., Lee, M.Y.Y., Xu, E.E., Sproul, S.L.J., Maslova, A., Sasaki, S., and Lynn, F.C. (2018). Single-Cell Transcriptome Profiling of Mouse and hESC-Derived Pancreatic Progenitors. *Stem Cell Reports* *11*, 1551-1564.

Kuilman, T. (2020). CopywriteR: Copy number information from targeted sequencing using off-target reads (Bioconductor from within R).

Kuilman, T., Michaloglou, C., Vredeveld, L.C., Douma, S., van Doorn, R., Desmet, C.J., Aarden, L.A., Mooi, W.J., and Peeper, D.S. (2008). Oncogene-induced senescence relayed by an interleukin-dependent inflammatory network. *Cell* *133*, 1019-1031.

Kuleshov, M.V., Jones, M.R., Rouillard, A.D., Fernandez, N.F., Duan, Q., Wang, Z., Koplev, S., Jenkins, S.L., Jagodnik, K.M., and Lachmann, A. (2016). Enrichr: a comprehensive gene set enrichment analysis web server 2016 update. *Nucleic acids research* *44*, W90-W97.

Lee, A.Y.L., Dubois, C.L., Sarai, K., Zarei, S., Schaeffer, D.F., Sander, M., and Kopp, J.L. (2018). Cell of origin affects tumour development and phenotype in pancreatic ductal adenocarcinoma. *Gut*.

Lee, S., and Schmitt, C.A. (2019). The dynamic nature of senescence in cancer. *Nature cell biology* *21*, 94-101.

Leek, J.T., Johnson, W.E., Parker, H.S., Jaffe, A.E., and Storey, J.D. (2012). The sva package for removing batch effects and other unwanted variation in high-throughput experiments. *Bioinformatics* *28*, 882-883.

Lesina, M., Wormann, S.M., Morton, J., Diakopoulos, K.N., Korneeva, O., Wimmer, M., Einwachter, H., Sperveslage, J., Demir, I.E., Kehl, T., *et al.* (2016). RelA regulates CXCL1/CXCR2-dependent oncogene-induced senescence in murine Kras-driven pancreatic carcinogenesis. *The Journal of clinical investigation* *126*, 2919-2932.

Levine, J.H., Simonds, E.F., Bendall, S.C., Davis, K.L., Amir el, A.D., Tadmor, M.D., Litvin, O., Fienberg, H.G., Jager, A., Zunder, E.R., *et al.* (2015). Data-Driven Phenotypic Dissection of AML Reveals Progenitor-like Cells that Correlate with Prognosis. *Cell* *162*, 184-197.

Li, Y., Deng, S., Peng, J., Wang, X., Essandoh, K., Mu, X., Peng, T., Meng, Z.X., and Fan, G.C. (2019). MicroRNA-223 is essential for maintaining functional beta-cell mass during diabetes through inhibiting both FOXO1 and SOX6 pathways. *J Biol Chem* *294*, 10438-10448.

Liao, Y., Smyth, G.K., and Shi, W. (2019). The R package Rsubread is easier, faster, cheaper and better for alignment and quantification of RNA sequencing reads. *Nucleic Acids Research* *47*, e47-e47.

Lin, A.W., Barradas, M., Stone, J.C., van Aelst, L., Serrano, M., and Lowe, S.W. (1998). Premature senescence involving p53 and p16 is activated in response to constitutive MEK/MAPK mitogenic signaling. *Genes & development* *12*, 3008-3019.

Linta, L., Stockmann, M., Kleinhans, K.N., Bockers, A., Storch, A., Zaehres, H., Lin, Q., Barbi, G., Bockers, T.M., Kleger, A., *et al.* (2012). Rat embryonic fibroblasts improve reprogramming of human keratinocytes into induced pluripotent stem cells. *Stem cells and development* *21*, 965-976.

Love, M.I., Huber, W., and Anders, S. (2014). Moderated estimation of fold change and dispersion for RNA-seq data with DESeq2. *Genome biology* *15*, 550.

Lun, A.T., McCarthy, D.J., and Marioni, J.C. (2016). A step-by-step workflow for low-level analysis of single-cell RNA-seq data with Bioconductor. *F1000Res* *5*, 2122.

Ma, H., Wert, K.J., Shvartsman, D., Melton, D.A., and Jaenisch, R. (2018). Establishment of human pluripotent stem cell-derived pancreatic  $\beta$ -like cells in the mouse pancreas. *Proc Natl Acad Sci U S A* *115*, 3924-3929.

Macosko, E.Z., Basu, A., Satija, R., Nemes, J., Shekhar, K., Goldman, M., Tirosh, I., Bialas, A.R., Kamitaki, N., and Martersteck, E.M. (2015). Highly parallel genome-wide expression profiling of individual cells using nanoliter droplets. *Cell* *161*, 1202-1214.

Maléth, J., Balázs, A., Pallagi, P., Balla, Z., Kui, B., Katona, M., Judák, L., Németh, I., Kemény, L.V., Rakonczay, Z., Jr., *et al.* (2015). Alcohol disrupts levels and function of the cystic fibrosis transmembrane conductance regulator to promote development of pancreatitis. *Gastroenterology* *148*, 427-439.e416.

Mali, P., Yang, L., Esvelt, K.M., Aach, J., Guell, M., DiCarlo, J.E., Norville, J.E., and Church, G.M. (2013). RNA-guided human genome engineering via Cas9. *Science* *339*, 823-826.

McInnes, L., Healy, J., and Melville, J. (2018). Umap: Uniform manifold approximation and projection for dimension reduction. *arXiv preprint arXiv:180203426*.

Messal, H.A., Alt, S., Ferreira, R.M.M., Gribben, C., Wang, V.M., Cotoi, C.G., Salbreux, G., and Behrens, A. (2019). Tissue curvature and apicobasal mechanical tension imbalance instruct cancer morphogenesis. *Nature* *566*, 126-130.

Moffitt, R.A., Marayati, R., Flate, E.L., Volmar, K.E., Loeza, S.G., Hoadley, K.A., Rashid, N.U., Williams, L.A., Eaton, S.C., Chung, A.H., *et al.* (2015). Virtual microdissection identifies distinct tumor- and stroma-specific subtypes of pancreatic ductal adenocarcinoma. *Nat Genet* *47*, 1168-1178.

Molnár, R., Madácsy, T., Varga, Á., Németh, M., Katona, X., Görög, M., Molnár, B., Fanczal, J., Rakonczay, Z., and Hegyi, P. (2020). Mouse pancreatic ductal organoid culture as a relevant model to study exocrine pancreatic ion secretion. *Laboratory Investigation* *100*, 84-97.

Moreira, L., Bakir, B., Chatterji, P., Dantes, Z., Reichert, M., and Rustgi, A.K. (2018). Pancreas 3D Organoids: Current and Future Aspects as a Research Platform for Personalized Medicine in Pancreatic Cancer. *Cellular and molecular gastroenterology and hepatology* *5*, 289-298.

Morton, J.P., Timpson, P., Karim, S.A., Ridgway, R.A., Athineos, D., Doyle, B., Jamieson, N.B., Oien, K.A., Lowy, A.M., Brunton, V.G., *et al.* (2010). Mutant p53 drives metastasis and overcomes growth arrest/senescence in pancreatic cancer. *Proc Natl Acad Sci U S A* *107*, 246-251.

Mueller, S., Engleitner, T., Maresch, R., Zukowska, M., Lange, S., Kaltenbacher, T., Konukiewicz, B., Ollinger, R., Zwiebel, M., Strong, A., *et al.* (2018). Evolutionary routes and KRAS dosage define pancreatic cancer phenotypes. *Nature* *554*, 62-68.

Nostro, M.C., Sarangi, F., Yang, C., Holland, A., Elefanty, A.G., Stanley, E.G., Greiner, D.L., and Keller, G. (2015). Efficient generation of NKX6-1+ pancreatic progenitors from multiple human pluripotent stem cell lines. *Stem Cell Reports* *4*, 591-604.



- Notta, F., Chan-Seng-Yue, M., Lemire, M., Li, Y., Wilson, G.W., Connor, A.A., Denroche, R.E., Liang, S.B., Brown, A.M., Kim, J.C., *et al.* (2016). A renewed model of pancreatic cancer evolution based on genomic rearrangement patterns. *Nature* *538*, 378-382.
- O'Hayre, M., Vazquez-Prado, J., Kufareva, I., Stawiski, E.W., Handel, T.M., Seshagiri, S., and Gutkind, J.S. (2013). The emerging mutational landscape of G proteins and G-protein-coupled receptors in cancer. *Nature reviews Cancer* *13*, 412-424.
- Ohashi, S., Natsuizaka, M., Wong, G.S., Michaylira, C.Z., Grugan, K.D., Stairs, D.B., Kalabis, J., Vega, M.E., Kalman, R.A., Nakagawa, M., *et al.* (2010). Epidermal growth factor receptor and mutant p53 expand an esophageal cellular subpopulation capable of epithelial-to-mesenchymal transition through ZEB transcription factors. *Cancer Res* *70*, 4174-4184.
- Parekh, S., Ziegenhain, C., Vieth, B., Enard, W., and Hellmann, I. (2016). The impact of amplification on differential expression analyses by RNA-seq. *Scientific reports* *6*, 25533.
- Parvanescu, A., Cros, J., Ronot, M., Hentic, O., Grybek, V., Couvelard, A., Levy, P., Chanson, P., Ruszniewski, P., Sauvanet, A., *et al.* (2014). Lessons from McCune-Albright syndrome-associated intraductal papillary mucinous neoplasms: : GNAS-activating mutations in pancreatic carcinogenesis. *JAMA Surg* *149*, 858-862.
- Patra, K.C., Bardeesy, N., and Mizukami, Y. (2017). Diversity of Precursor Lesions For Pancreatic Cancer: The Genetics and Biology of Intraductal Papillary Mucinous Neoplasm. *Clinical and translational gastroenterology* *8*, e86.
- Patra, K.C., Kato, Y., Mizukami, Y., Widholz, S., Boukhali, M., Revenco, I., Grossman, E.A., Ji, F., Sadreyev, R.I., Liss, A.S., *et al.* (2018). Mutant GNAS drives pancreatic tumorigenesis by inducing PKA-mediated SIK suppression and reprogramming lipid metabolism. *Nature cell biology* *20*, 811-822.
- Perez-Riverol, Y., Csordas, A., Bai, J., Bernal-Llinares, M., Hewapathirana, S., Kundu, D.J., Inuganti, A., Griss, J., Mayer, G., Eisenacher, M., *et al.* (2019). The PRIDE database and related tools and resources in 2019: improving support for quantification data. *Nucleic Acids Res* *47*, D442-d450.
- Perkhofer, L., Schmitt, A., Romero Carrasco, M.C., Ihle, M., Hampp, S., Ruess, D.A., Hessmann, E., Russell, R., Lechel, A., Azoitei, N., *et al.* (2017). ATM Deficiency Generating Genomic Instability Sensitizes Pancreatic Ductal Adenocarcinoma Cells to Therapy-Induced DNA Damage. *Cancer research* *77*, 5576-5590.
- Poplin, R., Ruano-Rubio, V., DePristo, M.A., Fennell, T.J., Carneiro, M.O., Van der Auwera, G.A., Kling, D.E., Gauthier, L.D., Levy-Moonshine, A., Roazen, D., *et al.* (2018). Scaling accurate genetic variant discovery to tens of thousands of samples. *bioRxiv*, 201178.
- Puleo, F., Nicolle, R., Blum, Y., Cros, J., Marisa, L., Demetter, P., Quertinmont, E., Svrcek, M., Elarouci, N., Iovanna, J., *et al.* (2018). Stratification of Pancreatic Ductal Adenocarcinomas Based on Tumor and Microenvironment Features. *Gastroenterology* *155*, 1999-2013.e1993.
- Qadir, M.M.F., Álvarez-Cubela, S., Klein, D., van Dijk, J., Muñoz-Anquela, R., Moreno-Hernández, Y.B., Lanzoni, G., Sadiq, S., Navarro-Rubio, B., García, M.T., *et al.* (2020). Single-cell resolution analysis of the human pancreatic ductal progenitor cell niche. *Proc Natl Acad Sci U S A* *117*, 10876-10887.
- Qi, H., Yao, L., and Liu, Q. (2019). MicroRNA-96 regulates pancreatic beta cell function under the pathological condition of diabetes mellitus through targeting Foxo1 and Sox6. *Biochem Biophys Res Commun* *519*, 294-301.
- Rahib, L., Smith, B.D., Aizenberg, R., Rosenzweig, A.B., Fleshman, J.M., and Matrisian, L.M. (2014). Projecting cancer incidence and deaths to 2030: the unexpected burden of thyroid, liver, and pancreas cancers in the United States. *Cancer Res* *74*, 2913-2921.
- Rao, J., Pfeiffer, M.J., Frank, S., Adachi, K., Piccini, I., Quaranta, R., Araúzo-Bravo, M., Schwarz, J., Schade, D., and Leidel, S. (2016). Stepwise clearance of repressive roadblocks drives cardiac induction in human ESCs. *Cell stem cell* *18*, 341-353.

Ray, K.C., Bell, K.M., Yan, J., Gu, G., Chung, C.H., Washington, M.K., and Means, A.L. (2011). Epithelial tissues have varying degrees of susceptibility to Kras(G12D)-initiated tumorigenesis in a mouse model. *PLoS One* 6, e16786.

Reichert, M., Blume, K., Kleger, A., Hartmann, D., and von Figura, G. (2016). Developmental Pathways Direct Pancreatic Cancer Initiation from Its Cellular Origin. *Stem Cells Int* 2016, 9298535.

Renz, B.W., Takahashi, R., Tanaka, T., Macchini, M., Hayakawa, Y., Dantes, Z., Maurer, H.C., Chen, X., Jiang, Z., and Westphalen, C.B. (2018a).  $\beta$ 2 adrenergic-neurotrophin feedforward loop promotes pancreatic cancer. *Cancer cell* 33, 75-90. e77.

Renz, B.W., Tanaka, T., Sunagawa, M., Takahashi, R., Jiang, Z., Macchini, M., Dantes, Z., Valenti, G., White, R.A., and Middelhoff, M.A. (2018b). Cholinergic signaling via muscarinic receptors directly and indirectly suppresses pancreatic tumorigenesis and cancer stemness. *Cancer discovery* 8, 1458-1473.

Rezanejad, H., Ouziel-Yahalom, L., Keyzer, C.A., Sullivan, B.A., Hollister-Lock, J., Li, W.C., Guo, L., Deng, S., Lei, J., Markmann, J., *et al.* (2018). Heterogeneity of SOX9 and HNF1beta in Pancreatic Ducts Is Dynamic. *Stem Cell Reports* 10, 725-738.

Rezania, A., Bruin, J.E., Riedel, M.J., Mojibian, M., Asadi, A., Xu, J., Gauvin, R., Narayan, K., Karanu, F., O'Neil, J.J., *et al.* (2012). Maturation of human embryonic stem cell-derived pancreatic progenitors into functional islets capable of treating pre-existing diabetes in mice. *Diabetes* 61, 2016-2029.

Rhodes, J.A., Criscimanna, A., and Esni, F. (2012). Induction of mouse pancreatic ductal differentiation, an in vitro assay. *In Vitro Cell Dev Biol Anim* 48, 641-649.

Ritchie, M.E., Phipson, B., Wu, D., Hu, Y., Law, C.W., Shi, W., and Smyth, G.K. (2015). limma powers differential expression analyses for RNA-sequencing and microarray studies. *Nucleic Acids Res* 43, e47.

Roberts, N.J., Norris, A.L., Petersen, G.M., Bondy, M.L., Brand, R., Gallinger, S., Kurtz, R.C., Olson, S.H., Rustgi, A.K., Schwartz, A.G., *et al.* (2016). Whole Genome Sequencing Defines the Genetic Heterogeneity of Familial Pancreatic Cancer. *Cancer Discov* 6, 166-175.

Robinson, C., Estrada, A., Zaheer, A., Singh, V.K., Wolfgang, C.L., Goggins, M.G., Hruban, R.H., Wood, L.D., Noe, M., Montgomery, E.A., *et al.* (2018). Clinical and Radiographic Gastrointestinal Abnormalities in McCune-Albright Syndrome. *J Clin Endocrinol Metab* 103, 4293-4303.

Robinson, J.T., Thorvaldsdóttir, H., Winckler, W., Guttman, M., Lander, E.S., Getz, G., and Mesirov, J.P. (2011). Integrative genomics viewer. *In Nat Biotechnol*, pp. 24-26.

Rosenbaum, D.M., Rasmussen, S.G., and Kobilka, B.K. (2009). The structure and function of G-protein-coupled receptors. *Nature* 459, 356-363.

Rovira, M., Delaspre, F., Massumi, M., Serra, S.A., Valverde, M.A., Lloreta, J., Dufresne, M., Payré, B., Konieczny, S.F., Savatier, P., *et al.* (2008). Murine embryonic stem cell-derived pancreatic acinar cells recapitulate features of early pancreatic differentiation. *Gastroenterology* 135, 1301-1310, 1310.e1301-1305.

Rowe, R.G., and Daley, G.Q. (2019). Induced pluripotent stem cells in disease modelling and drug discovery. *Nat Rev Genet* 20, 377-388.

Rubio-Viqueira, B., Jimeno, A., Cusatis, G., Zhang, X., Iacobuzio-Donahue, C., Karikari, C., Shi, C., Danenberg, K., Danenberg, P.V., Kuramochi, H., *et al.* (2006). An in vivo platform for translational drug development in pancreatic cancer. *Clin Cancer Res* 12, 4652-4661.

Ruess, D.A., Heynen, G.J., Ciecieski, K.J., Ai, J., Berninger, A., Kabacaoglu, D., Görgülü, K., Dantes, Z., Wörmann, S.M., and Diakopoulos, K.N. (2018). Mutant KRAS-driven cancers depend on PTPN11/SHP2 phosphatase. *Nature medicine* 24, 954-960.

- Salinas-Souza, C., De Andrea, C., Bihl, M., Kovac, M., Pillay, N., Forshe, T., Gutteridge, A., Ye, H., Amary, M.F., Tirabosco, R., *et al.* (2015). GNAS mutations are not detected in parosteal and low-grade central osteosarcomas. *Mod Pathol* 28, 1336-1342.
- Sassone-Corsi, P. (2012). The cyclic AMP pathway. *Cold Spring Harbor perspectives in biology* 4.
- Sato, T., Vries, R.G., Snippert, H.J., van de Wetering, M., Barker, N., Stange, D.E., van Es, J.H., Abo, A., Kujala, P., Peters, P.J., *et al.* (2009). Single Lgr5 stem cells build crypt-villus structures in vitro without a mesenchymal niche. *Nature* 459, 262-265.
- Schaffer, A.E., Freude, K.K., Nelson, S.B., and Sander, M. (2010). Nkx6 transcription factors and Ptf1a function as antagonistic lineage determinants in multipotent pancreatic progenitors. *Developmental cell* 18, 1022-1029.
- Schindelin, J., Arganda-Carreras, I., Frise, E., Kaynig, V., Longair, M., Pietzsch, T., Preibisch, S., Rueden, C., Saalfeld, S., Schmid, B., *et al.* (2012). Fiji: an open-source platform for biological-image analysis. *Nat Methods* 9, 676-682.
- Seino, T., Kawasaki, S., Shimokawa, M., Tamagawa, H., Toshimitsu, K., Fujii, M., Ohta, Y., Matano, M., Nanki, K., Kawasaki, K., *et al.* (2018). Human Pancreatic Tumor Organoids Reveal Loss of Stem Cell Niche Factor Dependence during Disease Progression. *Cell stem cell* 22, 454-467 e456.
- Serrano, M., Lin, A.W., McCurrach, M.E., Beach, D., and Lowe, S.W. (1997). Oncogenic ras provokes premature cell senescence associated with accumulation of p53 and p16INK4a. *Cell* 88, 593-602.
- Shain, A.H., Giacomini, C.P., Matsukuma, K., Karikari, C.A., Bashyam, M.D., Hidalgo, M., Maitra, A., and Pollack, J.R. (2012). Convergent structural alterations define SWI/SNF chromatin remodeler as a central tumor suppressive complex in pancreatic cancer. *Proc Natl Acad Sci U S A* 109, E252-259.
- Shih, H.P., Wang, A., and Sander, M. (2013). Pancreas organogenesis: from lineage determination to morphogenesis. *Annual review of cell and developmental biology* 29, 81-105.
- Smit, M.A., and Peeper, D.S. (2008). Deregulating EMT and senescence: double impact by a single twist. *Cancer Cell* 14, 5-7.
- Song, J. (2007). EMT or apoptosis: a decision for TGF-beta. *Cell Res* 17, 289-290.
- Song, J., and Shi, W. (2018). The concomitant apoptosis and EMT underlie the fundamental functions of TGF-β. *Acta Biochim Biophys Sin (Shanghai)* 50, 91-97.
- Springer, S., Wang, Y., Dal Molin, M., Masica, D.L., Jiao, Y., Kinde, I., Blackford, A., Raman, S.P., Wolfgang, C.L., Tomita, T., *et al.* (2015). A combination of molecular markers and clinical features improve the classification of pancreatic cysts. *Gastroenterology* 149, 1501-1510.
- Subramanian, A., Tamayo, P., Mootha, V.K., Mukherjee, S., Ebert, B.L., Gillette, M.A., Paulovich, A., Pomeroy, S.L., Golub, T.R., and Lander, E.S. (2005). Gene set enrichment analysis: a knowledge-based approach for interpreting genome-wide expression profiles. *Proceedings of the National Academy of Sciences* 102, 15545-15550.
- Takebe, T., Sekine, K., Kimura, M., Yoshizawa, E., Ayano, S., Koido, M., Funayama, S., Nakanishi, N., Hisai, T., Kobayashi, T., *et al.* (2017). Massive and Reproducible Production of Liver Buds Entirely from Human Pluripotent Stem Cells. *Cell Rep* 21, 2661-2670.
- Takeuchi, S., Takahashi, A., Motoi, N., Yoshimoto, S., Tajima, T., Yamakoshi, K., Hirao, A., Yanagi, S., Fukami, K., Ishikawa, Y., *et al.* (2010). Intrinsic cooperation between p16INK4a and p21Waf1/Cip1 in the onset of cellular senescence and tumor suppression in vivo. *Cancer Res* 70, 9381-9390.
- Taki, K., Ohmuraya, M., Tanji, E., Komatsu, H., Hashimoto, D., Semba, K., Araki, K., Kawaguchi, Y., Baba, H., and Furukawa, T. (2016). GNAS(R201H) and Kras(G12D) cooperate to promote murine pancreatic tumorigenesis recapitulating human intraductal papillary mucinous neoplasm. *Oncogene* 35, 2407-2412.

Tan, M.C., Basturk, O., Brannon, A.R., Bhanot, U., Scott, S.N., Bouvier, N., LaFemina, J., Jarnagin, W.R., Berger, M.F., Klimstra, D., *et al.* (2015). GNAS and KRAS Mutations Define Separate Progression Pathways in Intraductal Papillary Mucinous Neoplasm-Associated Carcinoma. *Journal of the American College of Surgeons* 220, 845-854.e841.

Tarasov, A., Vilella, A.J., Cuppen, E., Nijman, I.J., and Prins, P. (2015). Sambamba: fast processing of NGS alignment formats. *Bioinformatics* 31, 2032-2034.

Tiriac, H., Bucobo, J.C., Tzimas, D., Grewel, S., Lacombe, J.F., Rowehl, L.M., Nagula, S., Wu, M., Kim, J., Sasson, A., *et al.* (2018). Successful creation of pancreatic cancer organoids by means of EUS-guided fine-needle biopsy sampling for personalized cancer treatment. *Gastrointest Endosc* 87, 1474-1480.

Topno, N.S., Kannan, M., and Krishna, R. (2018). Mechanistic insights into the activity of Ptf1-p48 (pancreas transcription factor 1a): probing the interactions levels of Ptf1-p48 with E2A-E47 (transcription factor E2-alpha) and ID3 (inhibitor of DNA binding 3). *J Biomol Struct Dyn* 36, 1834-1852.

Traag, V. (2015). *louvain-igraph: v0.5.3 (Version v0.5.3)*. Zenodo. (Zenodo).

Tu, Q., Hao, J., Zhou, X., Yan, L., Dai, H., Sun, B., Yang, D., An, S., Lv, L., Jiao, B., *et al.* (2018). CDKN2B deletion is essential for pancreatic cancer development instead of unmeaningful co-deletion due to juxtaposition to CDKN2A. *Oncogene* 37, 128-138.

Tulpule, A., Kelley, J.M., Lensch, M.W., McPherson, J., Park, I.H., Hartung, O., Nakamura, T., Schlaeger, T.M., Shimamura, A., and Daley, G.Q. (2013). Pluripotent stem cell models of Shwachman-Diamond syndrome reveal a common mechanism for pancreatic and hematopoietic dysfunction. *Cell stem cell* 12, 727-736.

Villani, V., Thornton, M.E., Zook, H.N., Crook, C.J., Grubbs, B.H., Orlando, G., De Filippo, R., Ku, H.T., and Perin, L. (2019). SOX9+/PTF1A+ Cells Define the Tip Progenitor Cells of the Human Fetal Pancreas of the Second Trimester. *Stem Cells Transl Med* 8, 1249-1264.

Villasenor, A., Chong, D.C., Henkemeyer, M., and Cleaver, O. (2010). Epithelial dynamics of pancreatic branching morphogenesis. *Development* 137, 4295-4305.

Warlich, E., Kuehle, J., Cantz, T., Brugman, M.H., Maetzig, T., Galla, M., Filipczyk, A.A., Halle, S., Klump, H., and Schöler, H.R. (2011). Lentiviral vector design and imaging approaches to visualize the early stages of cellular reprogramming. *Molecular Therapy* 19, 782-789.

Wilschanski, M., and Novak, I. (2013). The cystic fibrosis of exocrine pancreas. *Cold Spring Harb Perspect Med* 3, a009746.

Wolf, F.A., Angerer, P., Ramirez, F., Virshup, I., Rybakov, S., Eraslan, G., White, T., Luecken, M., Cittaro, D., Callies, T., *et al.* (2020). *scanpy.tl.rank\_genes\_groups*.

Wolf, F.A., Angerer, P., and Theis, F.J. (2018). SCANPY: large-scale single-cell gene expression data analysis. *Genome Biol* 19, 15.

Wood, L.D., Noë, M., Hackeng, W., Brosens, L.A., Bhaijee, F., Debeljak, M., Yu, J., Suenaga, M., Singhi, A.D., and Zaheer, A. (2017). Patients with McCune-Albright syndrome have a broad spectrum of abnormalities in the gastrointestinal tract and pancreas. *Virchows Archiv* 470, 391-400.

Wu, F., Wu, D., Ren, Y., Huang, Y., Feng, B., Zhao, N., Zhang, T., Chen, X., Chen, S., and Xu, A. (2019). Generation of hepatobiliary organoids from human induced pluripotent stem cells. *J Hepatol* 70, 1145-1158.

Wu, J., Matthaei, H., Maitra, A., Dal Molin, M., Wood, L.D., Eshleman, J.R., Goggins, M., Canto, M.I., Schulick, R.D., Edil, B.H., *et al.* (2011). Recurrent GNAS mutations define an unexpected pathway for pancreatic cyst development. *Science translational medicine* 3, 92ra66.



- Xiang, B., and Muthuswamy, S.K. (2006). Using Three-Dimensional Acinar Structures for Molecular and Cell Biological Assays. *Methods in enzymology* 406, 692-701.
- Xiao, W., Hong, H., Awadallah, A., Zhou, L., and Xin, W. (2014). Utilization of CDX2 expression in diagnosing pancreatic ductal adenocarcinoma and predicting prognosis. *PLoS One* 9, e86853.
- Xie, R., Everett, L.J., Lim, H.W., Patel, N.A., Schug, J., Kroon, E., Kelly, O.G., Wang, A., D'Amour, K.A., Robins, A.J., *et al.* (2013). Dynamic chromatin remodeling mediated by polycomb proteins orchestrates pancreatic differentiation of human embryonic stem cells. *Cell stem cell* 12, 224-237.
- Xiong, J., Zhao, W.Q., Huang, G.H., Yao, L.H., Dong, H.M., Yu, C.H., Zhao, H.J., and Cai, S.X. (2017). [Receptor for advanced glycation end products upregulates MUC5AC expression and promotes mucus overproduction in mice with toluene diisocyanate-induced asthma]. *Nan Fang Yi Ke Da Xue Xue Bao* 37, 1301-1307.
- Yonezawa, S., Higashi, M., Yamada, N., and Goto, M. (2008). Precursor lesions of pancreatic cancer. *Gut Liver* 2, 137-154.
- Zecha, J., Satpathy, S., Kanashova, T., Avanesian, S.C., Kane, M.H., Clauser, K.R., Mertins, P., Carr, S.A., and Kuster, B. (2019). TMT Labeling for the Masses: A Robust and Cost-efficient, In-solution Labeling Approach. *Mol Cell Proteomics* 18, 1468-1478.
- Zeman, M.K., and Cimprich, K.A. (2014). Causes and consequences of replication stress. *Nature cell biology* 16, 2-9.
- Zhou, Q., Law, A.C., Rajagopal, J., Anderson, W.J., Gray, P.A., and Melton, D.A. (2007). A multipotent progenitor domain guides pancreatic organogenesis. *Dev Cell* 13, 103-114.
